# Supplementary material for: Friend or foe? The role of solvents in non-triplet, intraligand charge transfer sensitization of lanthanide(iii) luminescence
Source: Royal Society of Chemistry journal article supplement (doi:10.1039/c6ra15365h), 2016-01-01
Supplement: c6ra15365h1.pdf [file c6ra15365h1.pdf]

## Friend or Foe? The Role of Solvents in Non-Triplet, Intraligand Charge Transfer Sensitization of Lanthanide(III) Luminescence

Wai-Sum Lo, Wing-Tak Wong\*, Ga-Lai Law\*

Department of Applied Biology and Chemical Technology, The Hong Kong Polytechnic University, Hung Hom, Hong Kong SAR.

### *Supporting Information*

#### Contents

|                                                                                                   |    |
|---------------------------------------------------------------------------------------------------|----|
| Figure S1 Normalized absorption and excitation spectra of <b>Eu-1</b> in acetone .....            | 4  |
| Figure S2 Normalized absorption and excitation spectra of <b>Eu-1</b> in acetonitrile .....       | 4  |
| Figure S3 Normalized absorption and excitation spectra of <b>Eu-1</b> in CCl <sub>4</sub> .....   | 5  |
| Figure S4 Normalized absorption and excitation spectra of <b>Eu-1</b> in chloroform .....         | 5  |
| Figure S5 Normalized absorption and excitation spectra of <b>Eu-1</b> in 1,2-dichloroethane ..... | 6  |
| Figure S6 Normalized absorption and excitation spectra of <b>Eu-1</b> in dichloromethane .....    | 6  |
| Figure S7 Normalized absorption and excitation spectra of <b>Eu-1</b> in DMSO.....                | 7  |
| Figure S8 Normalized absorption and excitation spectra of <b>Eu-1</b> in ethyl acetate .....      | 7  |
| Figure S9 Normalized absorption and excitation spectra of <b>Eu-1</b> in isopropanol .....        | 8  |
| Figure S10 Normalized absorption and excitation spectra of <b>Eu-1</b> in methanol .....          | 8  |
| Figure S11 Normalized absorption and excitation spectra of <b>Eu-1</b> in tetrahydrofuran .....   | 9  |
| Figure S12 Normalized absorption and excitation spectra of <b>Eu-1</b> in toluene.....            | 9  |
| Figure S13 Emission spectra of <b>Eu-1</b> in acetone.....                                        | 10 |
| Figure S14 Emission spectra of <b>Eu-1</b> in acetonitrile.....                                   | 10 |
| Figure S15 Emission spectra of <b>Eu-1</b> in CCl <sub>4</sub> .....                              | 11 |
| Figure S16 Emission spectra of <b>Eu-1</b> in chloroform.....                                     | 11 |
| Figure S17 Emission spectra of <b>Eu-1</b> in 1,2-dichloroethane.....                             | 12 |
| Figure S18 Emission spectra of <b>Eu-1</b> in dichloromethane .....                               | 12 |
| Figure S19 Emission spectra of <b>Eu-1</b> in DMSO .....                                          | 13 |
| Figure S20 Emission spectra of <b>Eu-1</b> in ethyl acetate.....                                  | 13 |
| Figure S21 Emission spectra of <b>Eu-1</b> in isopropanol.....                                    | 14 |
| Figure S22 Emission spectra of <b>Eu-1</b> in methanol.....                                       | 14 |
| Figure S23 Emission spectra of <b>Eu-1</b> in tetrahydrofuran.....                                | 15 |

|                                                                                                   |    |
|---------------------------------------------------------------------------------------------------|----|
| Figure S24 Emission spectra of <b>Eu-1</b> in toluene .....                                       | 15 |
| Figure S25 Normalized absorption and excitation spectra of <b>Sm-1</b> in acetone .....           | 16 |
| Figure S26 Normalized absorption and excitation spectra of <b>Sm-1</b> in benzene.....            | 16 |
| Figure S27 Normalized absorption and excitation spectra of <b>Sm-1</b> in CCl <sub>4</sub> .....  | 17 |
| Figure S28 Normalized absorption and excitation spectra of <b>Sm-1</b> in chloroform.....         | 17 |
| Figure S29 Normalized absorption and excitation spectra of <b>Sm-1</b> in 1,2-dichloroethane..... | 18 |
| Figure S30 Normalized absorption and excitation spectra of <b>Sm-1</b> in dichloromethane.....    | 18 |
| Figure S31 Normalized absorption and excitation spectra of <b>Sm-1</b> in DMSO .....              | 19 |
| Figure S32 Normalized absorption and excitation spectra of <b>Sm-1</b> in ethyl acetate.....      | 19 |
| Figure S33 Normalized absorption and excitation spectra of <b>Sm-1</b> in isopropanol.....        | 20 |
| Figure S34 Normalized absorption and excitation spectra of <b>Sm-1</b> in methanol.....           | 20 |
| Figure S35 Normalized absorption and excitation spectra of <b>Sm-1</b> in fluorobenzene.....      | 21 |
| Figure S36 Normalized absorption and excitation spectra of <b>Sm-1</b> in tetrahydrofuran.....    | 21 |
| Figure S37 Normalized absorption and excitation spectra of <b>Sm-1</b> in toluene.....            | 22 |
| Figure S38 Emission spectra of <b>Sm-1</b> in acetone .....                                       | 22 |
| Figure S39 Emission spectra of <b>Sm-1</b> in acetonitrile .....                                  | 23 |
| Figure S40 Emission spectra of <b>Sm-1</b> in benzene .....                                       | 23 |
| Figure S41 Emission spectra of <b>Sm-1</b> in chloroform .....                                    | 24 |
| Figure S42 Emission spectra of <b>Sm-1</b> in dichloromethane .....                               | 24 |
| Figure S43 Emission spectra of <b>Sm-1</b> in DMF .....                                           | 25 |
| Figure S44 Emission spectra of <b>Sm-1</b> in DMSO.....                                           | 25 |
| Figure S45 Emission spectra of <b>Sm-1</b> in ethyl acetate .....                                 | 26 |
| Figure S46 Emission spectra of <b>Sm-1</b> in isopropanol .....                                   | 26 |
| Figure S47 Emission spectra of <b>Sm-1</b> in methanol .....                                      | 27 |
| Figure S48 Emission spectra of <b>Sm-1</b> in fluorobenzene .....                                 | 27 |
| Figure S49 Emission spectra of <b>Sm-1</b> in tetrahydrofuran .....                               | 28 |
| Figure S50 Normalized absorption and excitation spectra of <b>Yb-1</b> in acetone.....            | 28 |
| Figure S51 Normalized absorption and excitation spectra of <b>Yb-1</b> in acetonitrile .....      | 29 |
| Figure S52 Normalized absorption and excitation spectra of <b>Yb-1</b> in benzene.....            | 29 |
| Figure S53 Normalized absorption and excitation spectra of <b>Yb-1</b> in chloroform .....        | 30 |
| Figure S55 Normalized absorption and excitation spectra of <b>Yb-1</b> in DMSO.....               | 31 |
| Figure S56 Normalized absorption and excitation spectra of <b>Yb-1</b> in ethyl acetate .....     | 31 |
| Figure S57 Normalized absorption and excitation spectra of <b>Yb-1</b> in isopropanol .....       | 32 |
| Figure S58 Normalized absorption and excitation spectra of <b>Yb-1</b> in methanol .....          | 32 |
| Figure S59 Normalized absorption and excitation spectra of <b>Yb-1</b> in fluorobenzene .....     | 33 |
| Figure S60 Normalized absorption and excitation spectra of <b>Yb-1</b> in tetrahydrofuran .....   | 33 |

|                                                                                                  |    |
|--------------------------------------------------------------------------------------------------|----|
| Figure S61 Normalized absorption and excitation spectra of <b>Yb-1</b> in toluene .....          | 34 |
| Figure S62 Emission spectra of <b>Yb-1</b> in acetone .....                                      | 34 |
| Figure S63 Emission spectra of <b>Yb-1</b> in acetonitrile.....                                  | 35 |
| Figure S64 Emission spectra of <b>Yb-1</b> in benzene .....                                      | 35 |
| Figure S65 Emission spectra of <b>Yb-1</b> in chloroform.....                                    | 36 |
| Figure S66 Emission spectra of <b>Yb-1</b> in dichloromethane.....                               | 36 |
| Figure S67 Emission spectra of <b>Yb-1</b> in DMSO .....                                         | 37 |
| Figure S68 Emission spectra of <b>Yb-1</b> in ethyl acetate .....                                | 37 |
| Figure S69 Emission spectra of <b>Yb-1</b> in isopropanol.....                                   | 38 |
| Figure S70 Emission spectra of <b>Yb-1</b> in methanol.....                                      | 38 |
| Figure S71 Emission spectra of <b>Yb-1</b> in fluorobenzene.....                                 | 39 |
| Figure S72 Emission spectra of <b>Yb-1</b> in tetrahydrofuran.....                               | 39 |
| Figure S73 Low temperature (77 K) emission spectra of Gd(tta) <sub>3</sub> and <b>Gd-1</b> ..... | 40 |
| Figure S74 Room temperature and low temperature emission spectra of <b>Gd-1</b> .....            | 40 |
| Figure S75 Cyclic voltammograms of <b>Yb-1</b> , Yb(tta) <sub>3</sub> and ligand <b>1</b> .....  | 41 |
| Figure S76 Graph of selected absorbance against time of <b>Sm-1</b> in carbon tetrachloride..... | 41 |
| Figure S77 Graph of selected absorbance against time of <b>Sm-1</b> in chloroform.....           | 42 |
| Figure S78 Graph of selected absorbance against time of <b>Sm-1</b> in dichloromethane.....      | 42 |
| Figure S79 Graph of selected absorbance against time of <b>Sm-1</b> in benzene.....              | 43 |

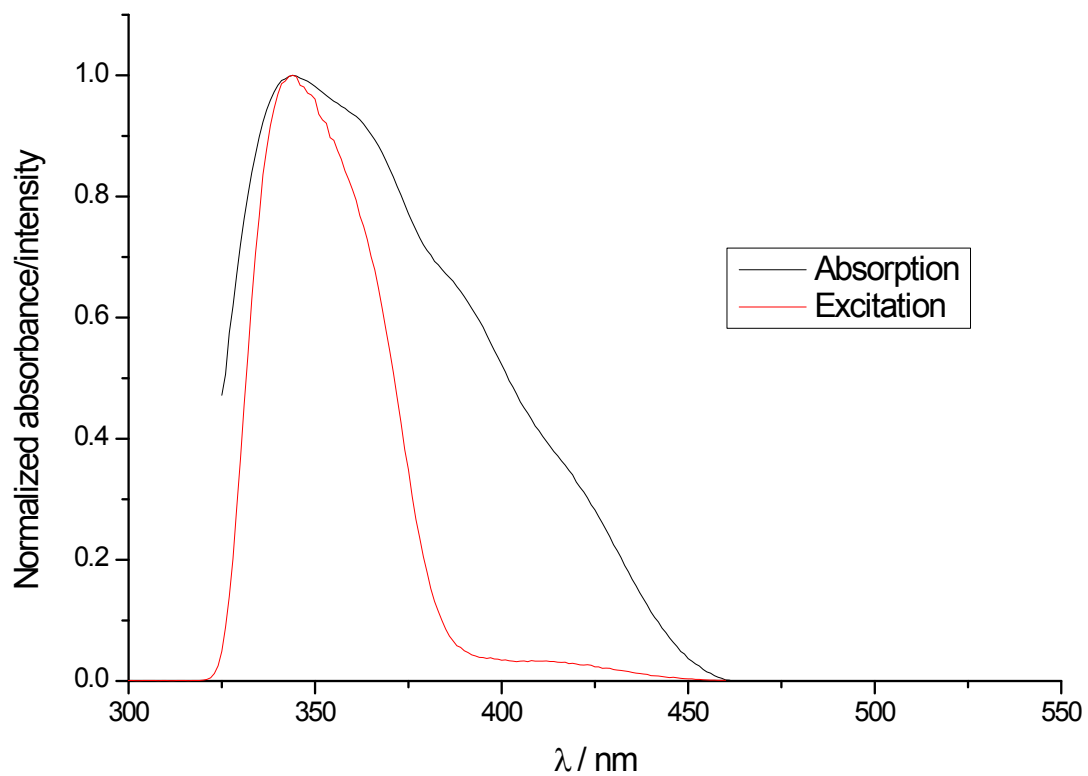

Figure S1 Normalized absorption and excitation spectra of **Eu-1** in acetone

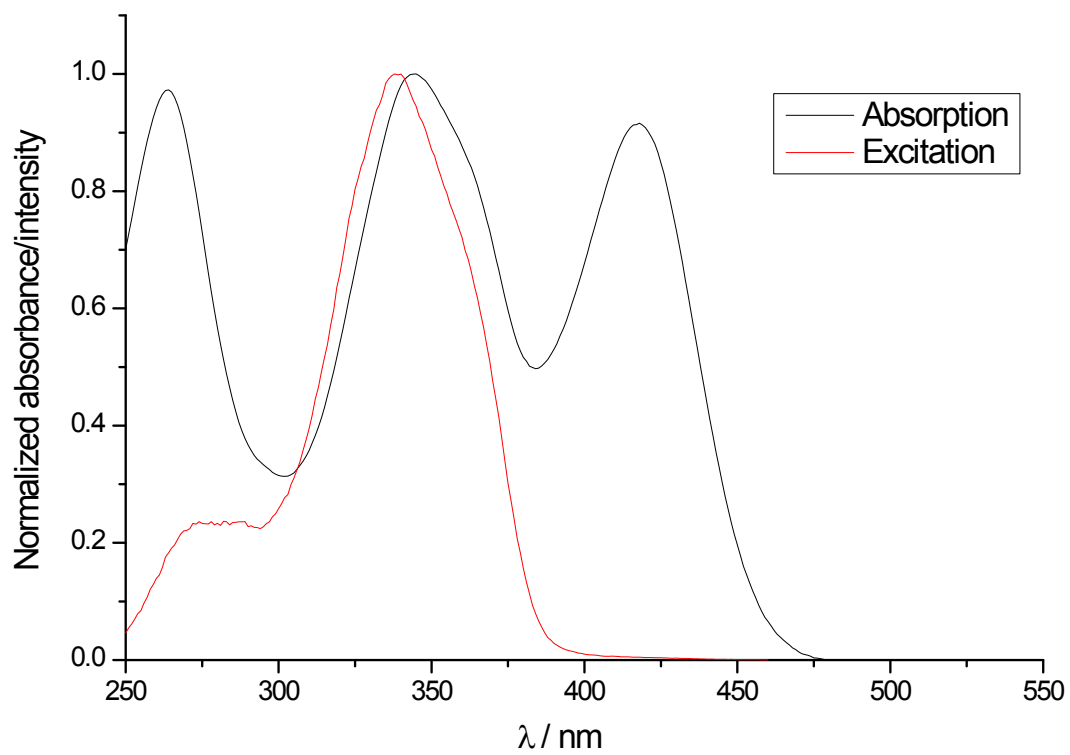

Figure S2 Normalized absorption and excitation spectra of **Eu-1** in acetonitrile

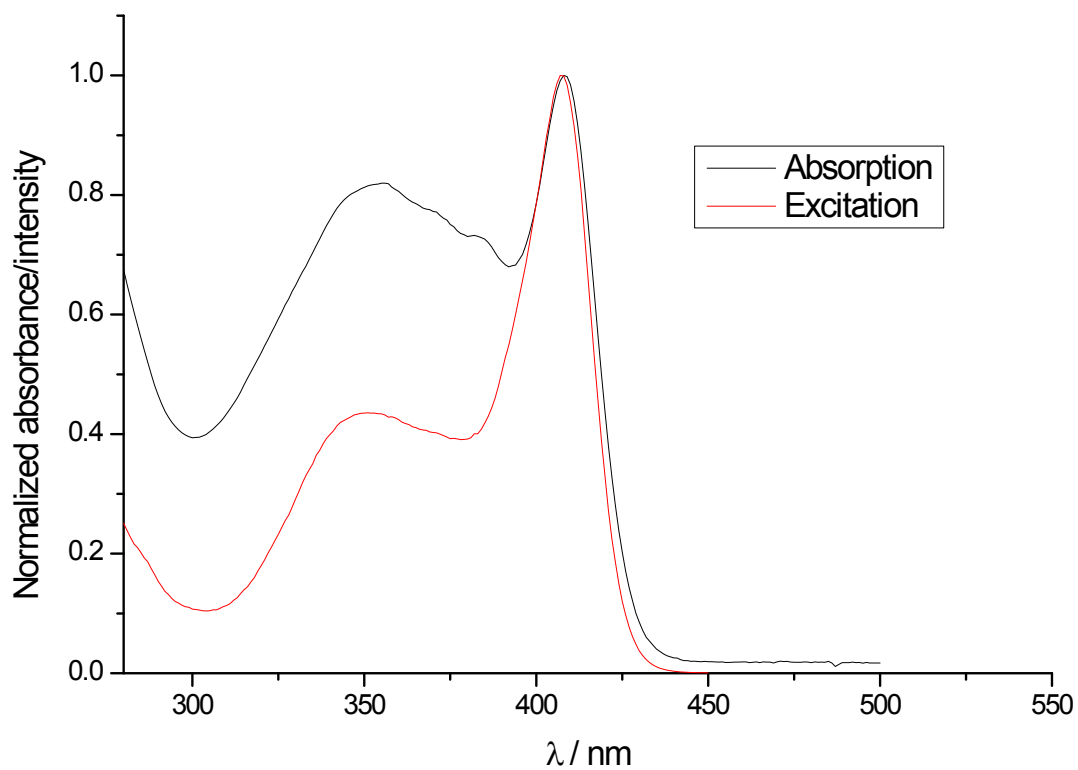

Figure S3 Normalized absorption and excitation spectra of **Eu-1** in  $\text{CCl}_4$

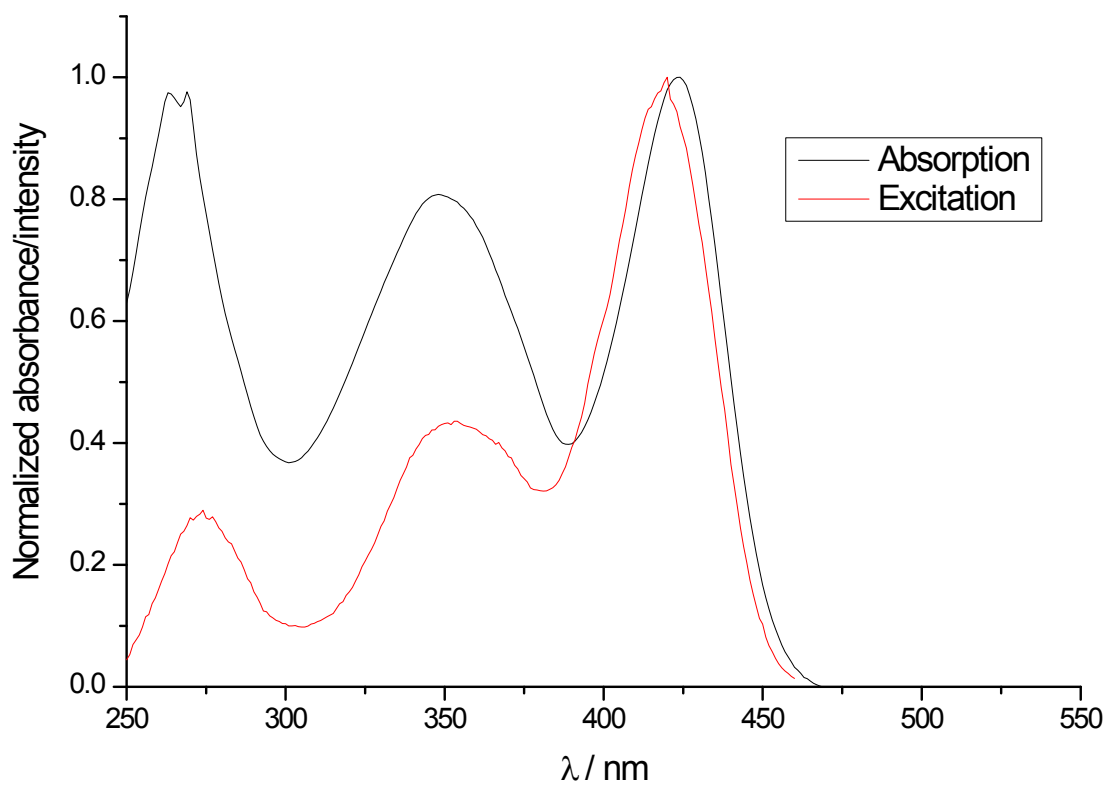

Figure S4 Normalized absorption and excitation spectra of **Eu-1** in chloroform

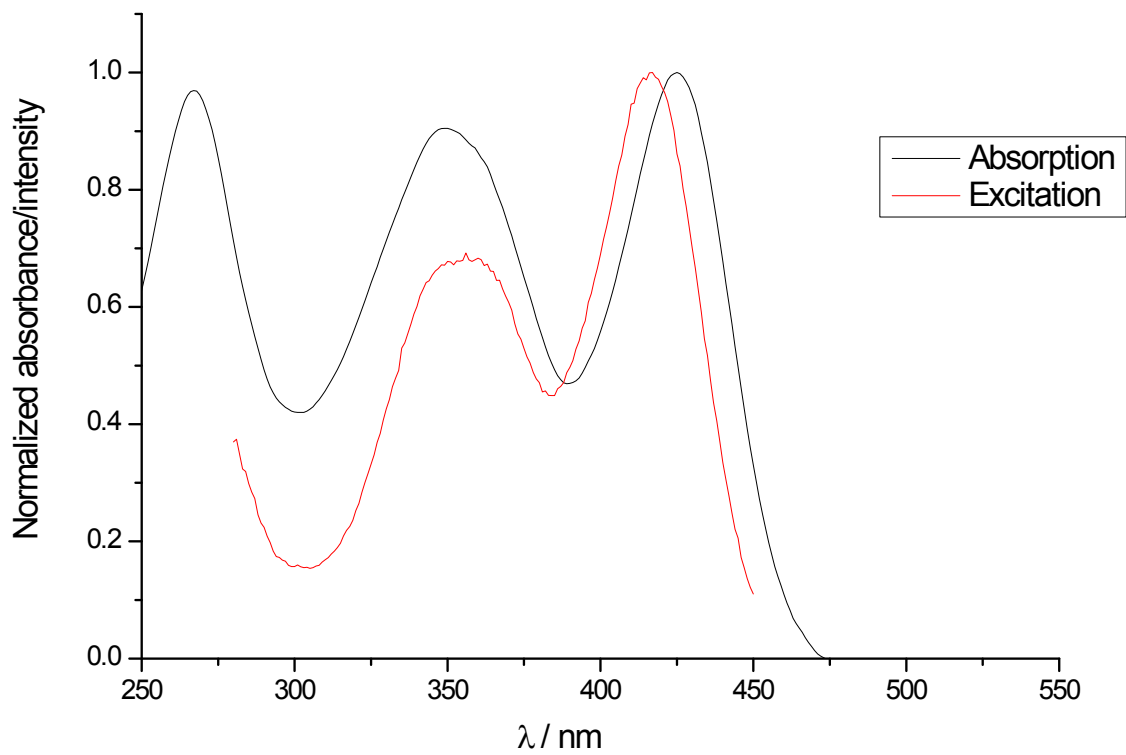

Figure S5 Normalized absorption and excitation spectra of **Eu-1** in 1,2-dichloroethane

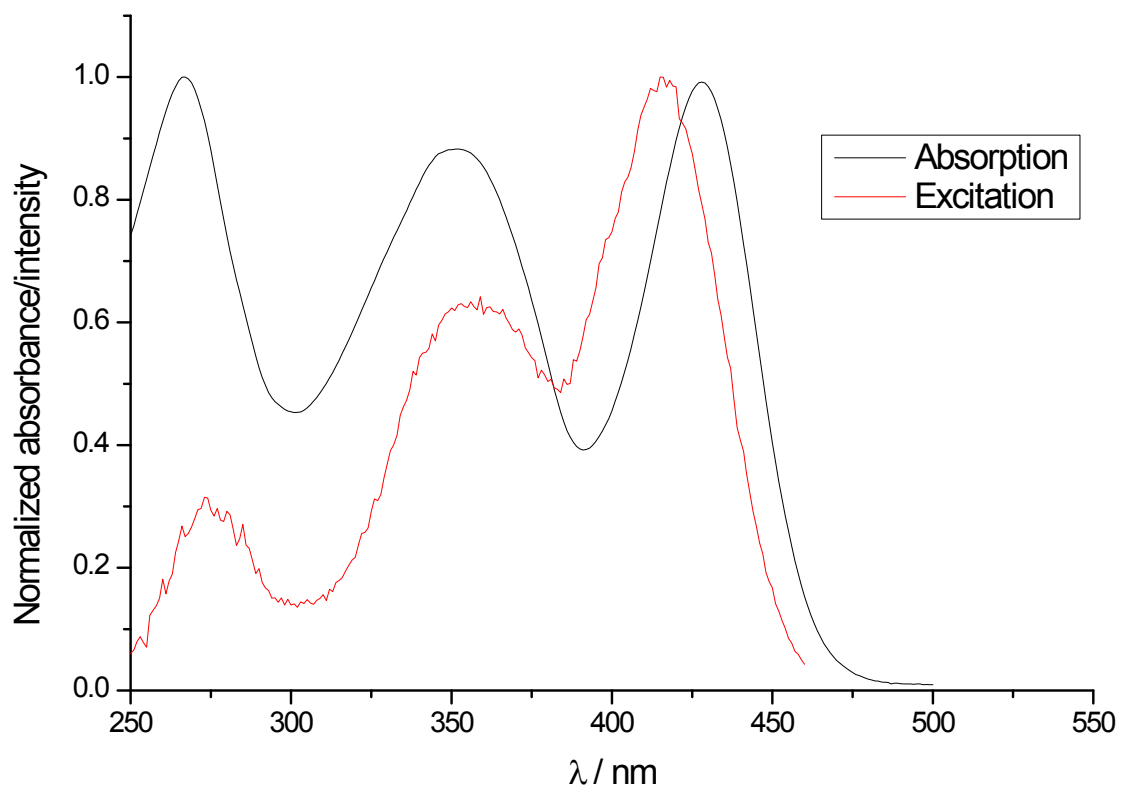

Figure S6 Normalized absorption and excitation spectra of **Eu-1** in dichloromethane

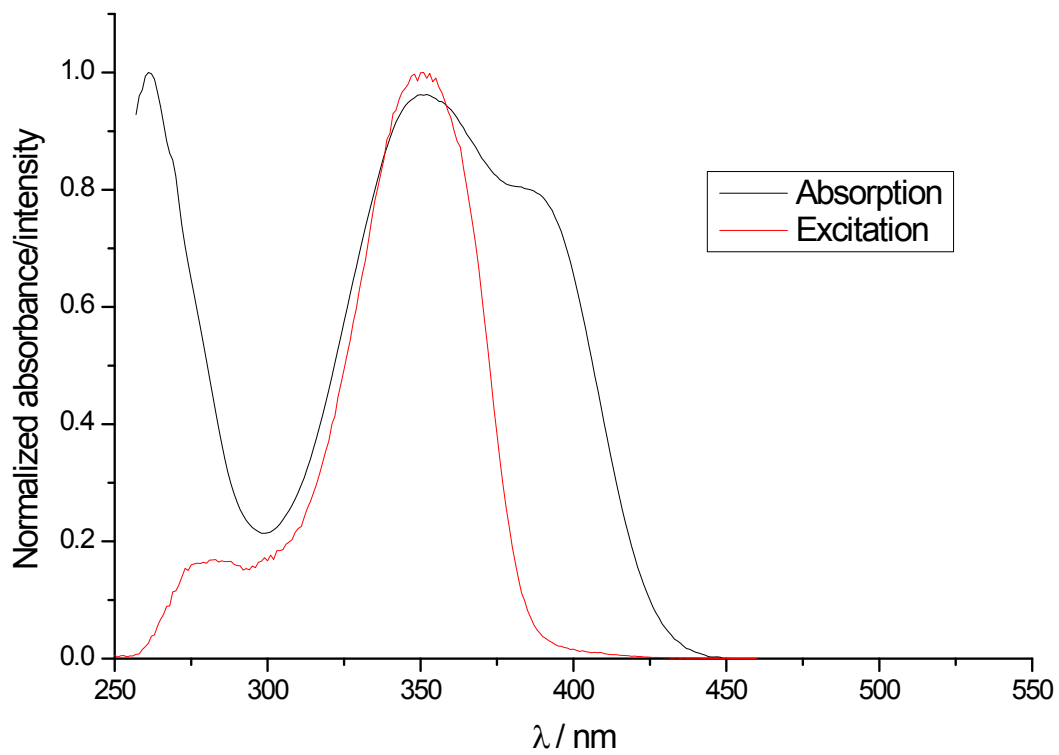

Figure S7 Normalized absorption and excitation spectra of **Eu-1** in DMSO

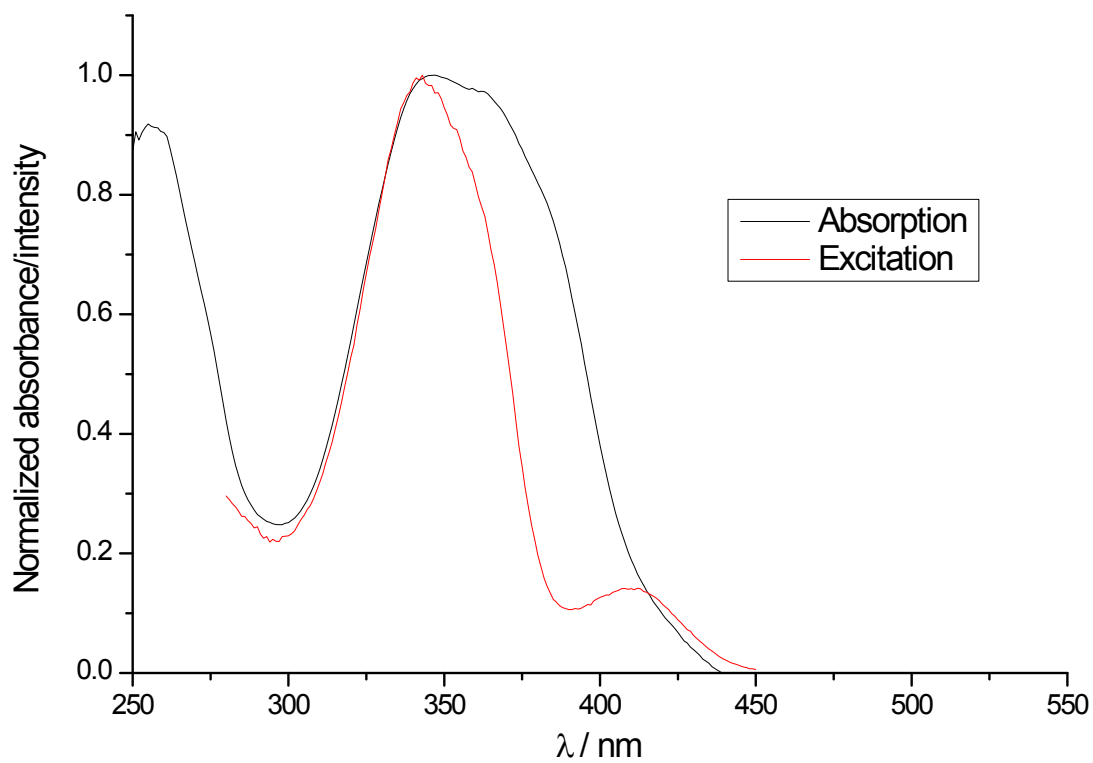

Figure S8 Normalized absorption and excitation spectra of **Eu-1** in ethyl acetate

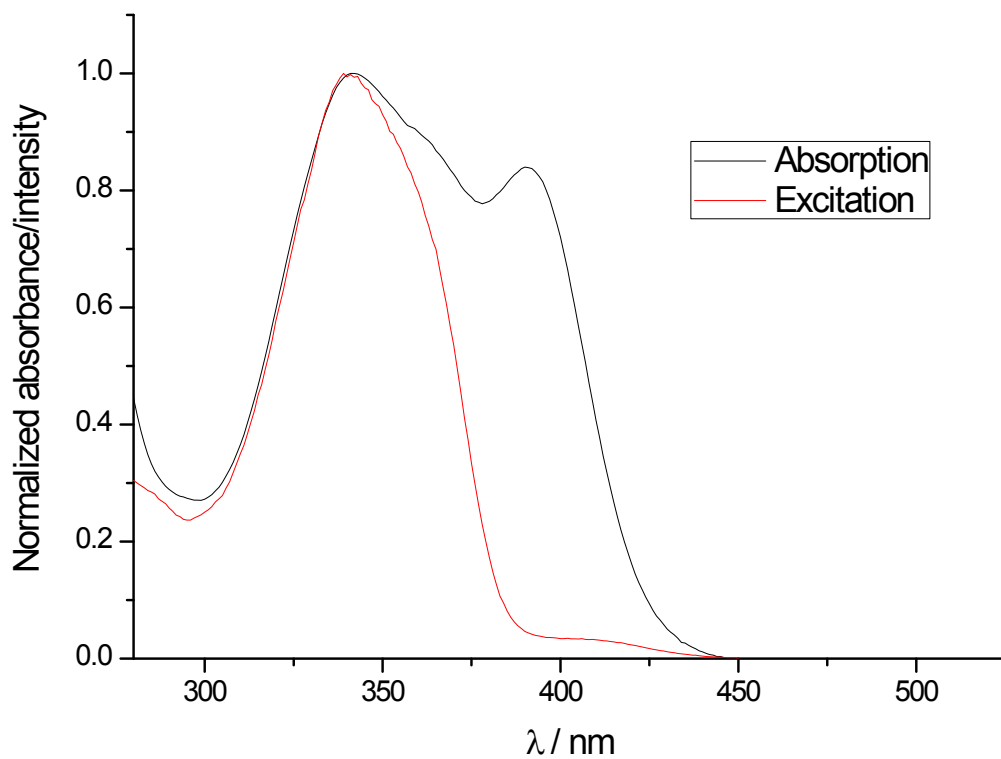

Figure S9 Normalized absorption and excitation spectra of **Eu-1** in isopropanol

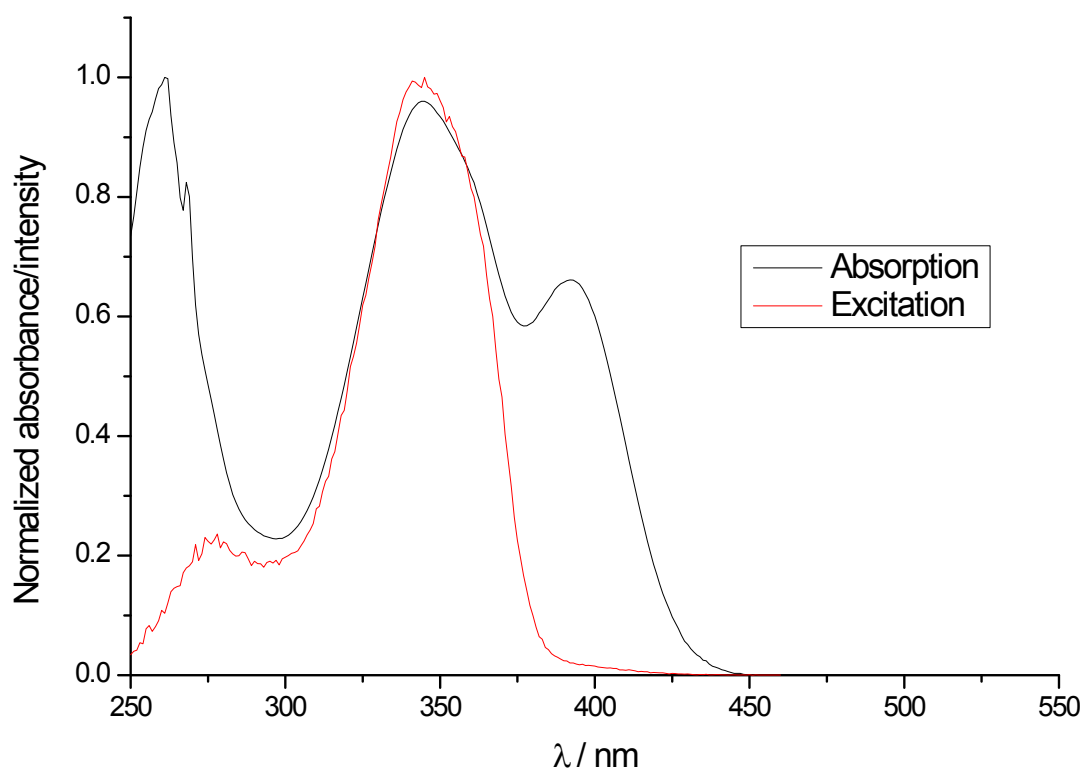

Figure S10 Normalized absorption and excitation spectra of **Eu-1** in methanol



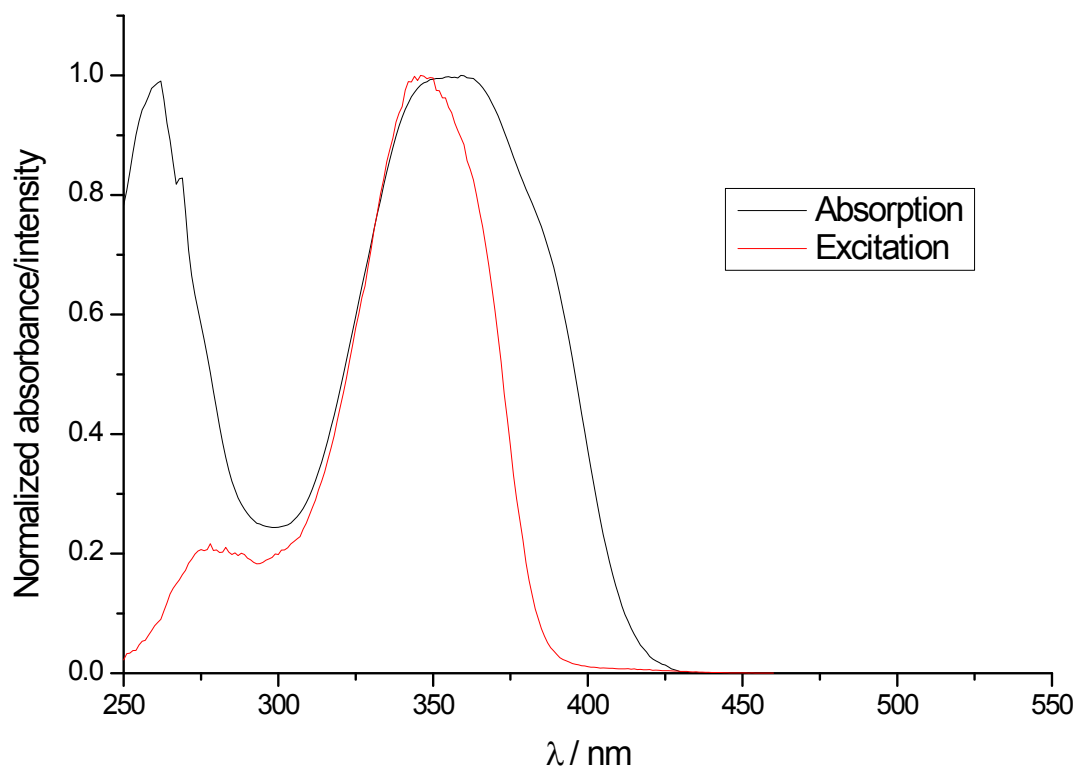

Figure S11 Normalized absorption and excitation spectra of **Eu-1** in tetrahydrofuran

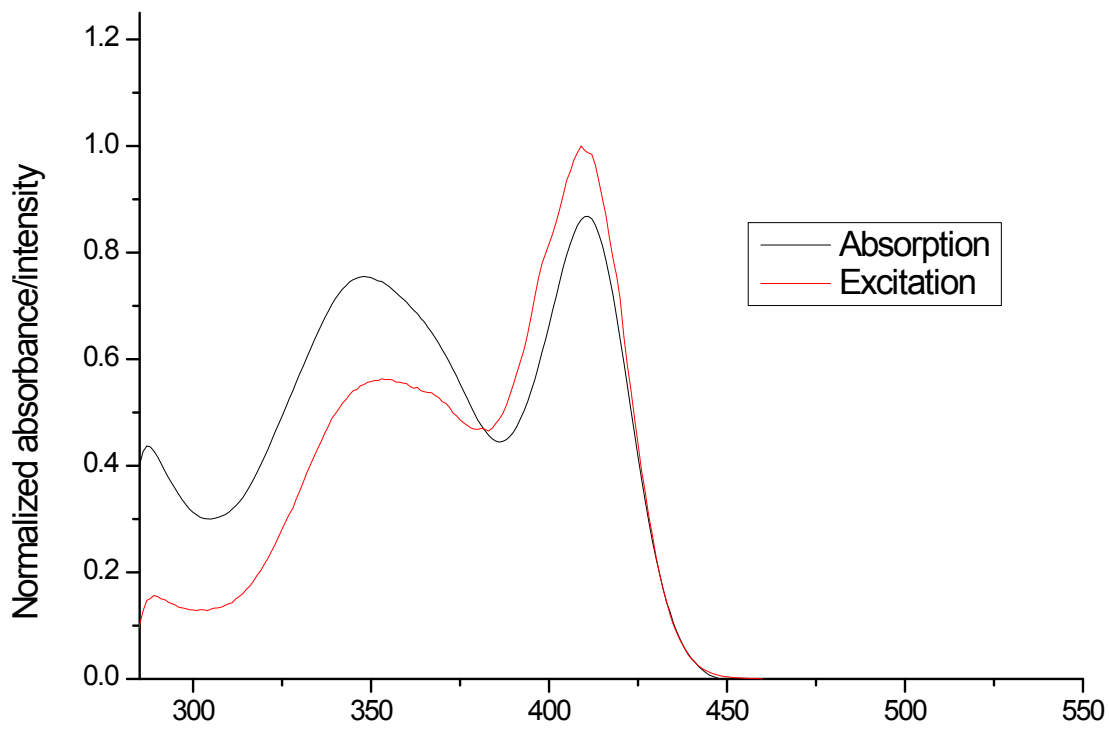

Figure S12 Normalized absorption and excitation spectra of **Eu-1** in toluene

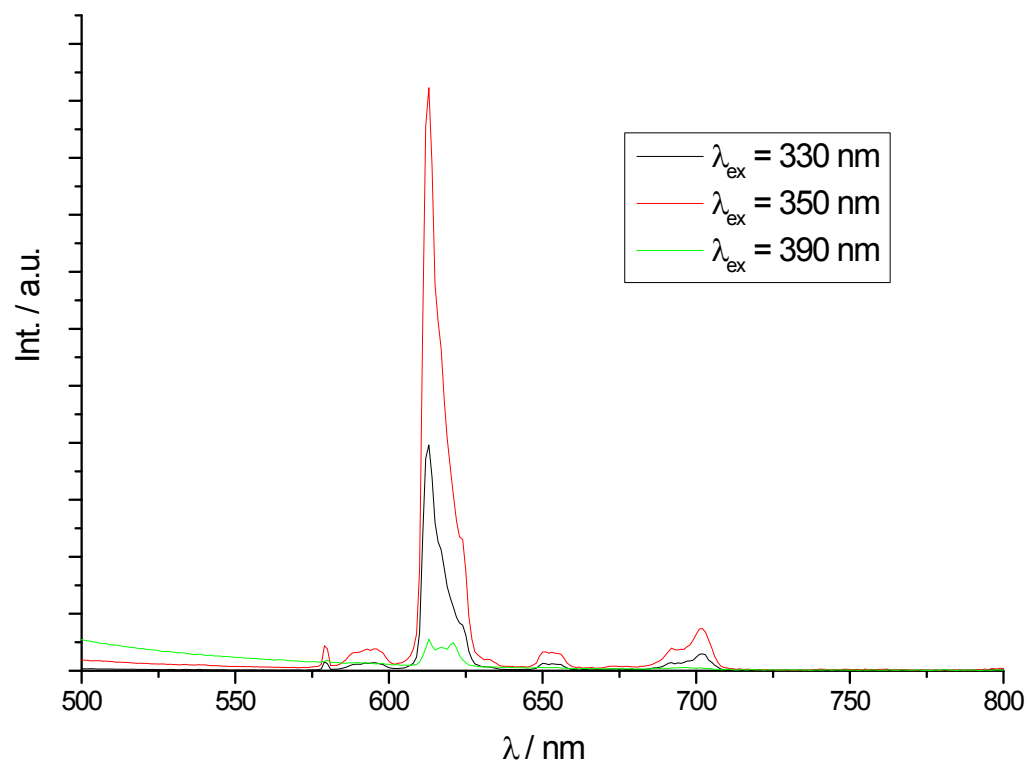

Figure S13 Emission spectra of **Eu-1** in acetone

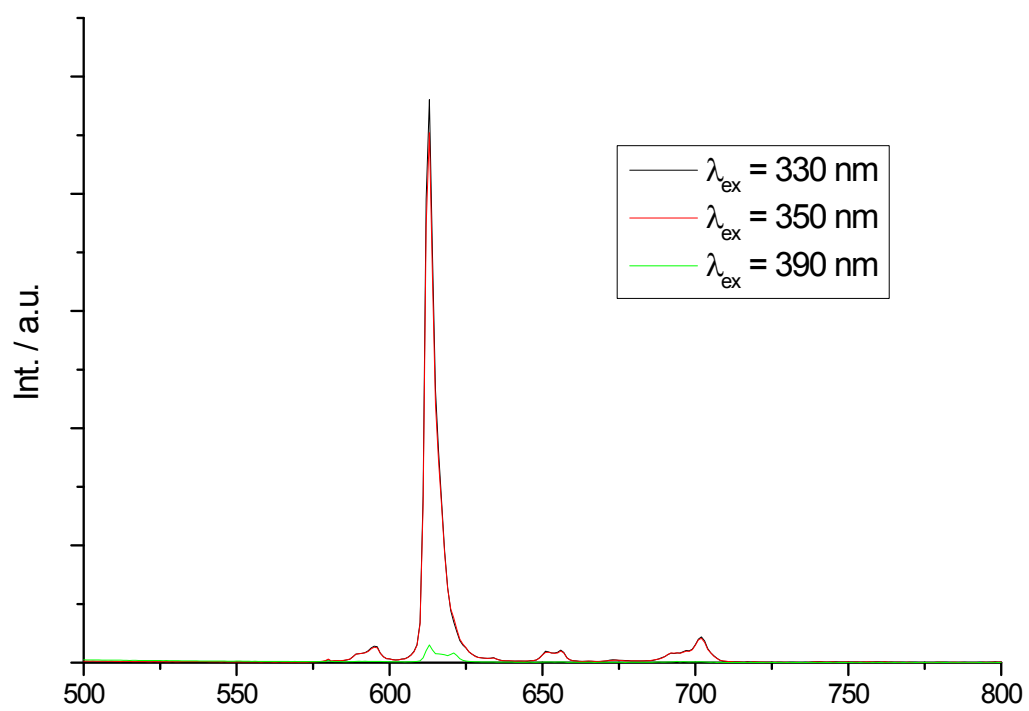

Figure S14 Emission spectra of **Eu-1** in acetonitrile

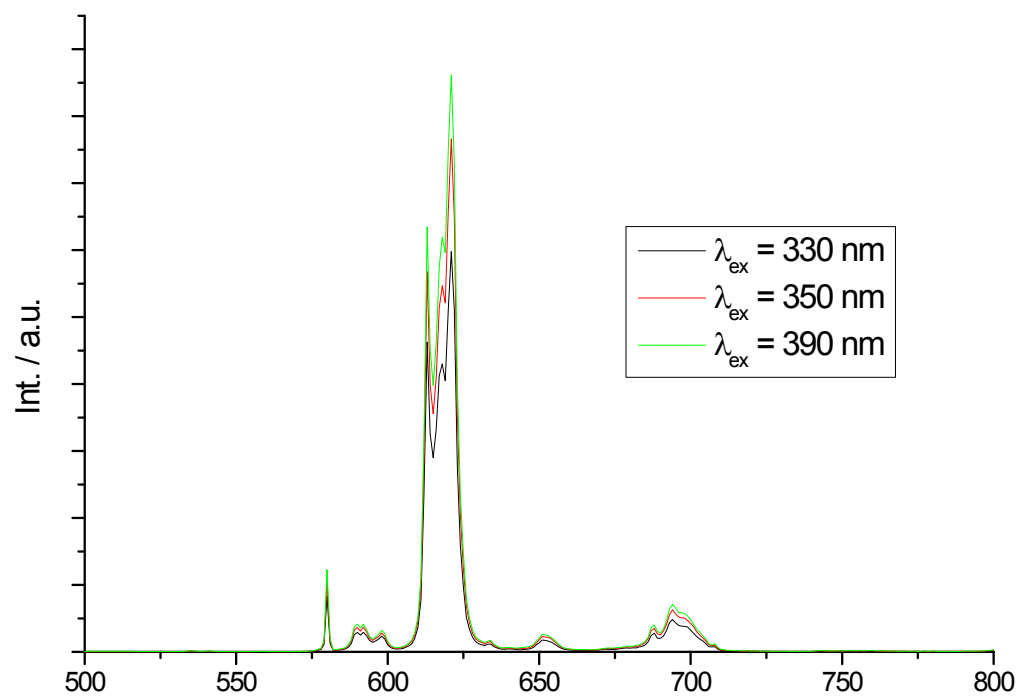

Figure S15 Emission spectra of **Eu-1** in CCl<sub>4</sub>

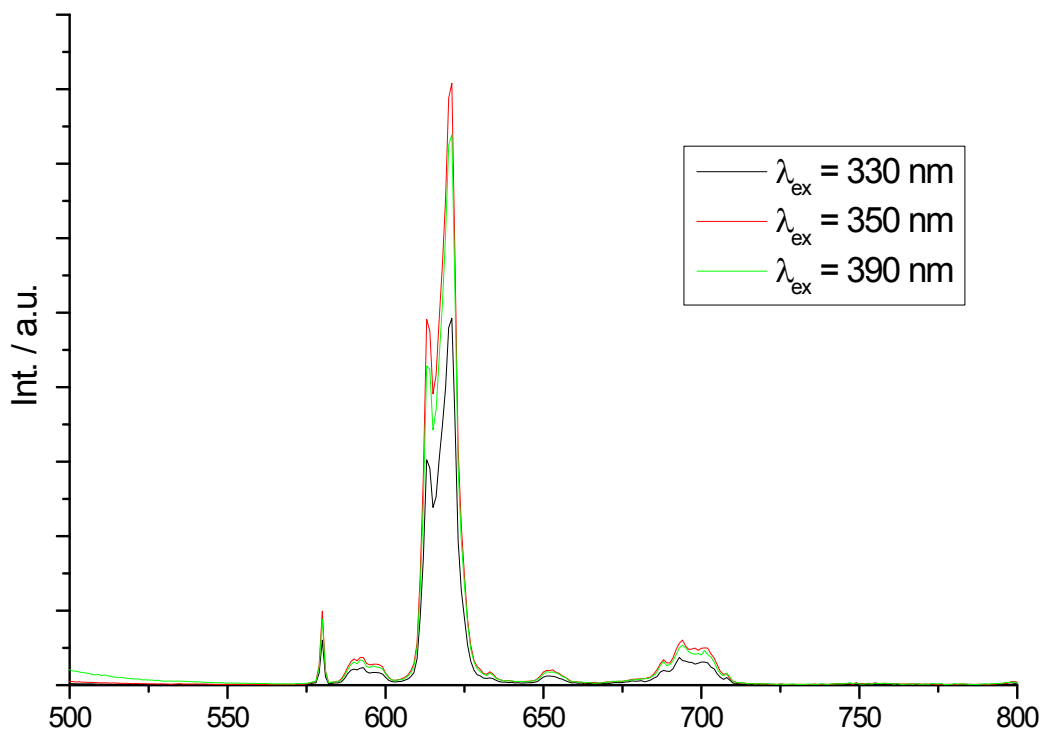

Figure S16 Emission spectra of **Eu-1** in chloroform

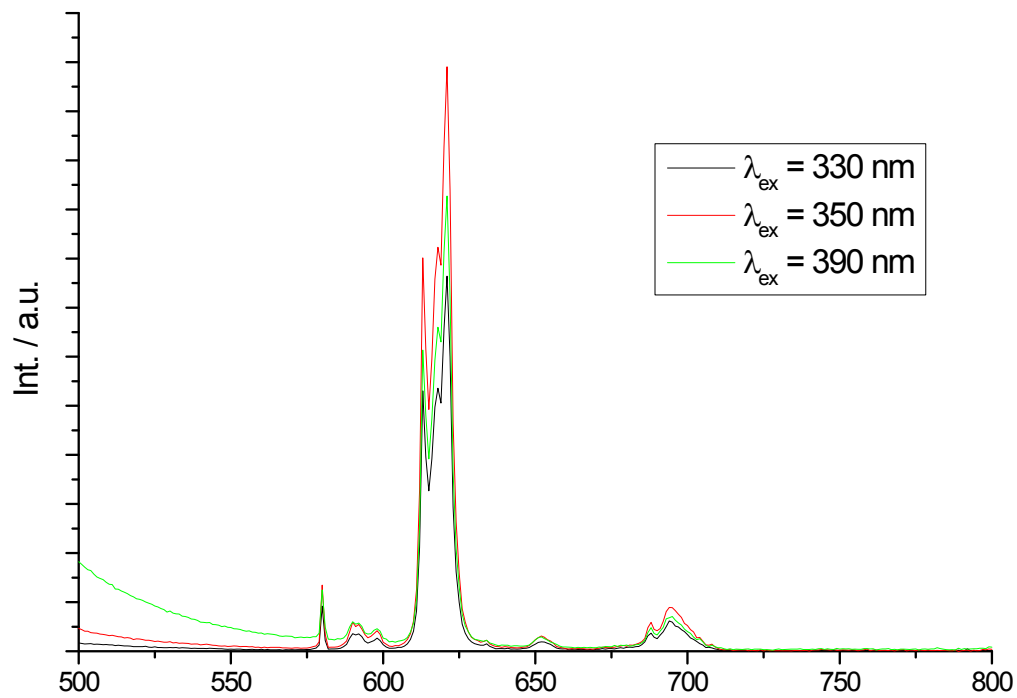

Figure S17 Emission spectra of **Eu-1** in 1,2-dichloroethane

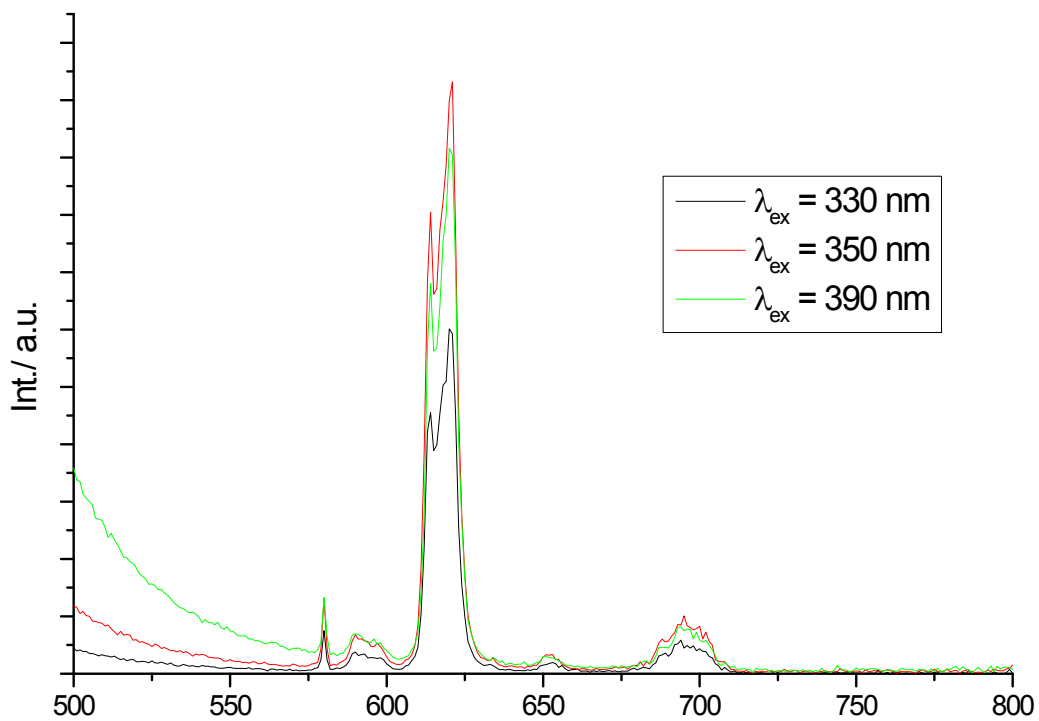

Figure S18 Emission spectra of **Eu-1** in dichloromethane

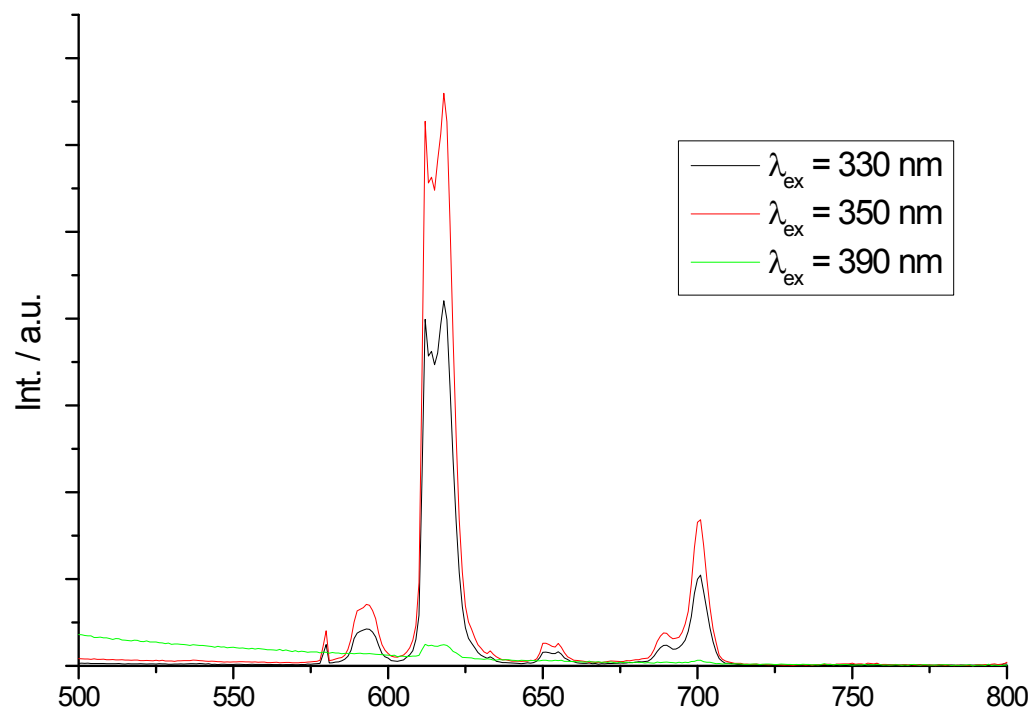

Figure S19 Emission spectra of **Eu-1** in DMSO

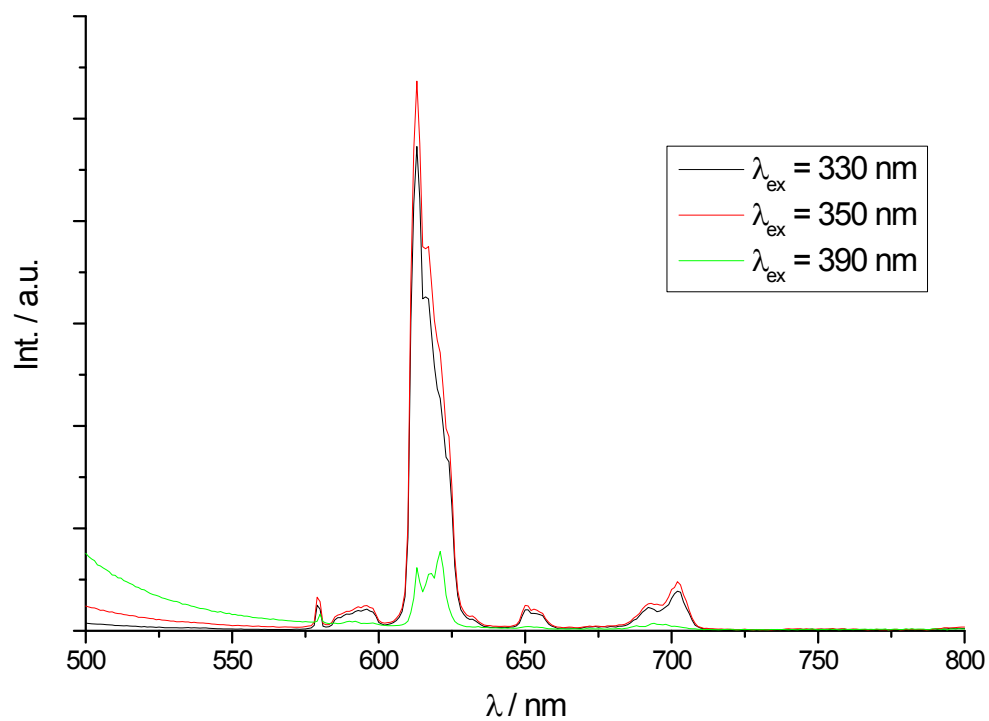

Figure S20 Emission spectra of **Eu-1** in ethyl acetate

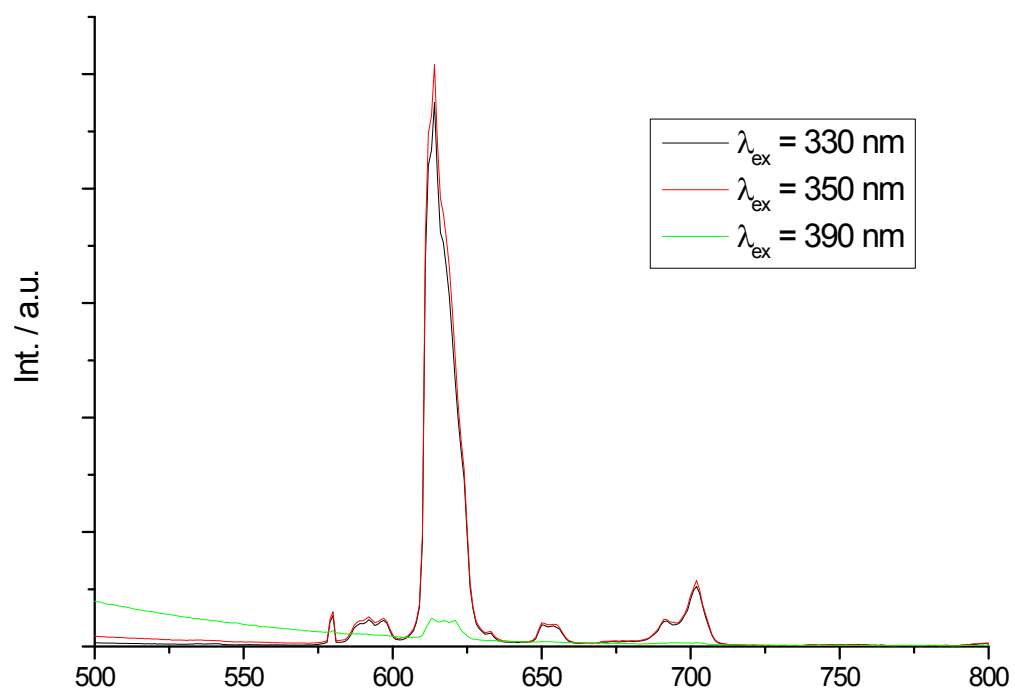

Figure S21 Emission spectra of **Eu-1** in isopropanol

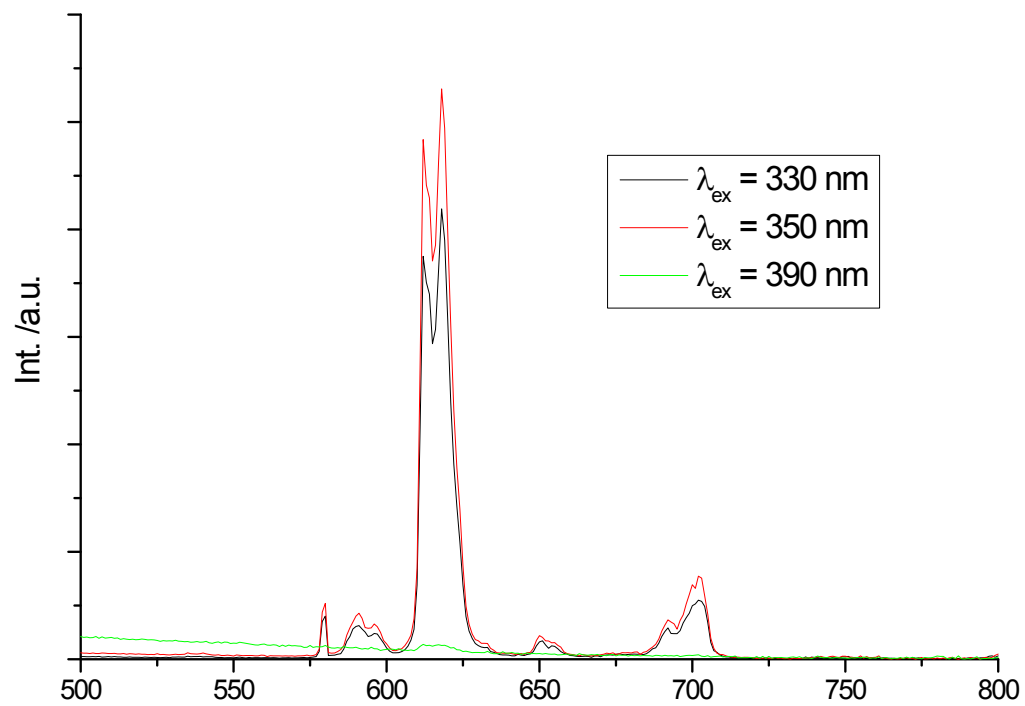

Figure S22 Emission spectra of **Eu-1** in methanol

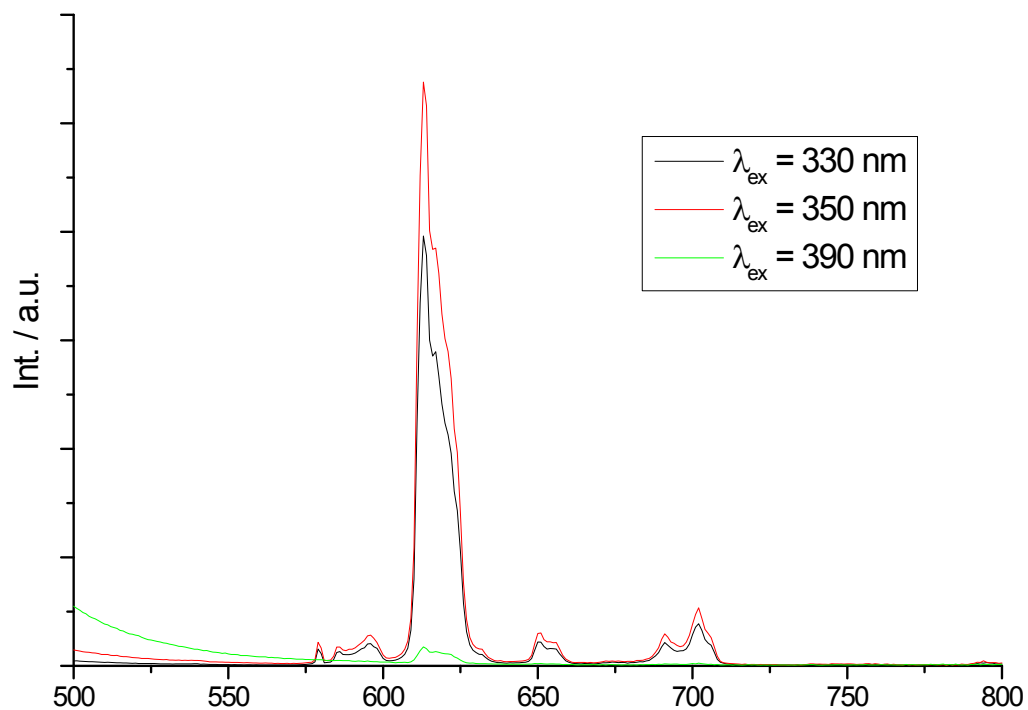

Figure S23 Emission spectra of **Eu-1** in tetrahydrofuran

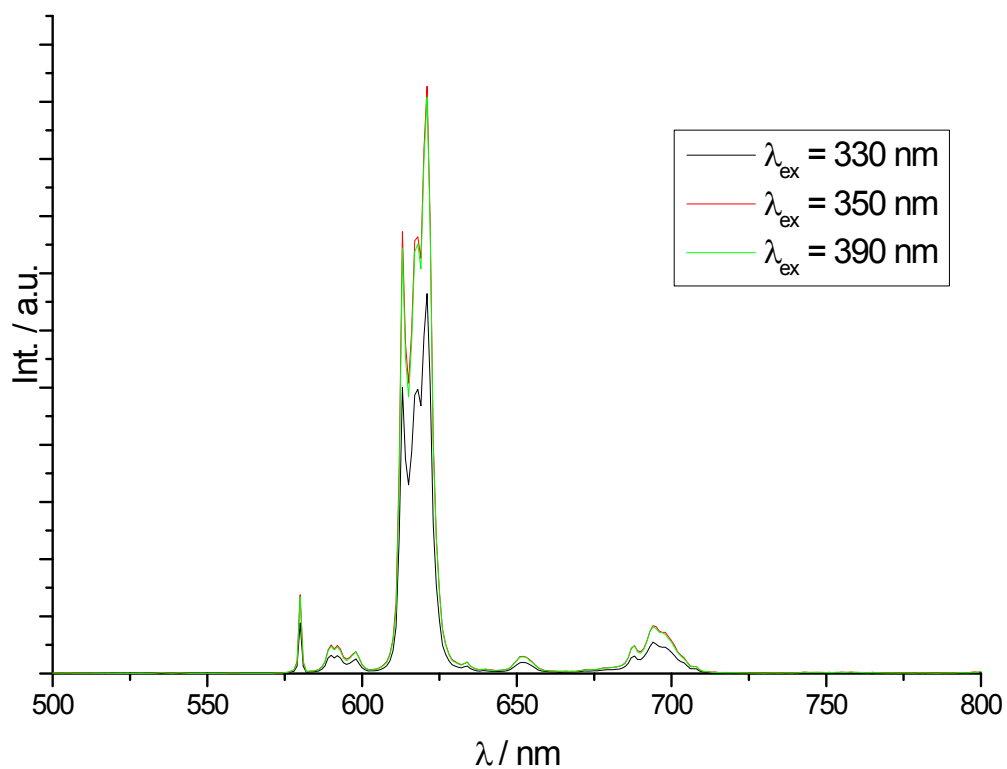

Figure S24 Emission spectra of **Eu-1** in toluene

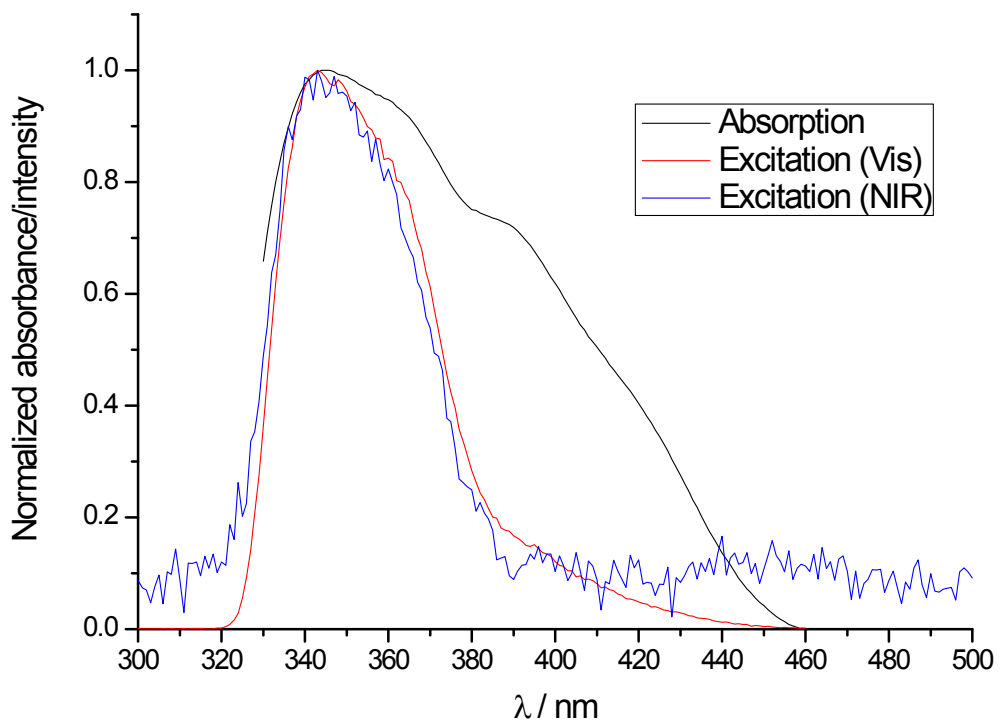

Figure S25 Normalized absorption and excitation spectra of **Sm-1** in acetone

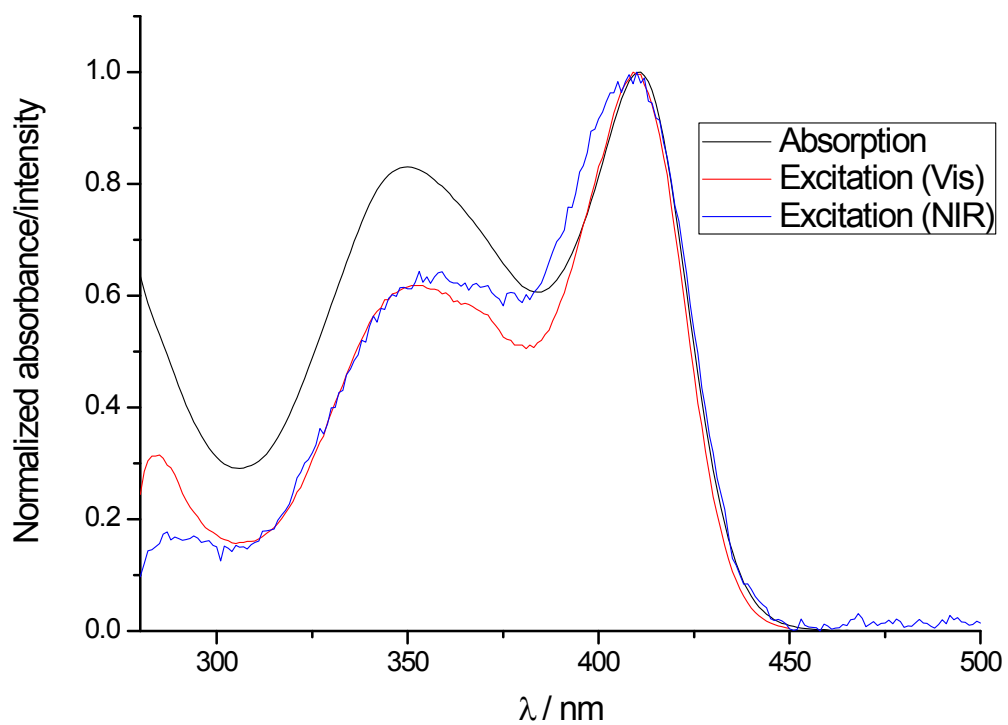

Figure S26 Normalized absorption and excitation spectra of **Sm-1** in benzene



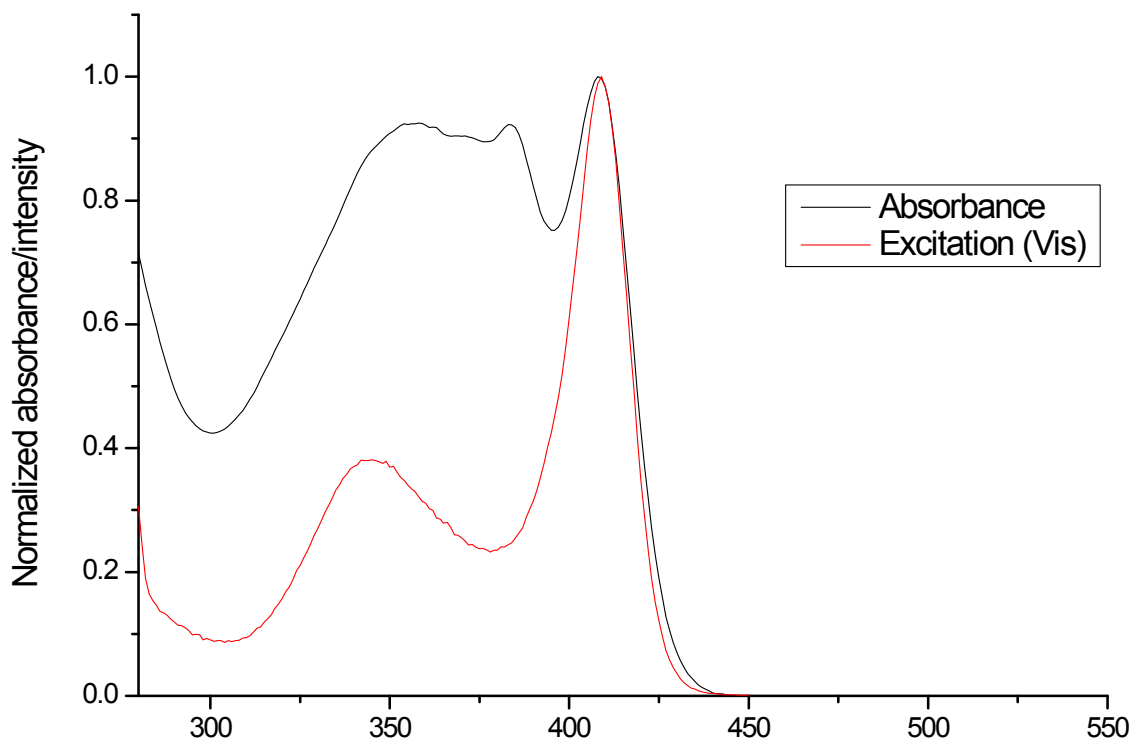

Figure S27 Normalized absorption and excitation spectra of **Sm-1** in CCl<sub>4</sub>

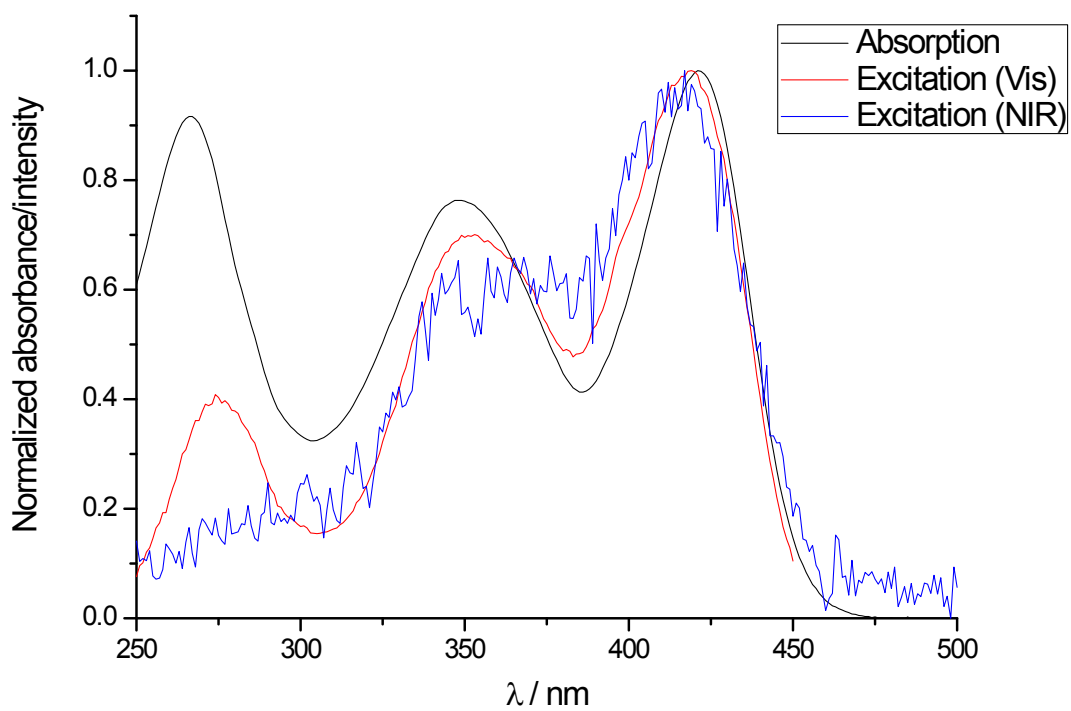

Figure S28 Normalized absorption and excitation spectra of **Sm-1** in chloroform

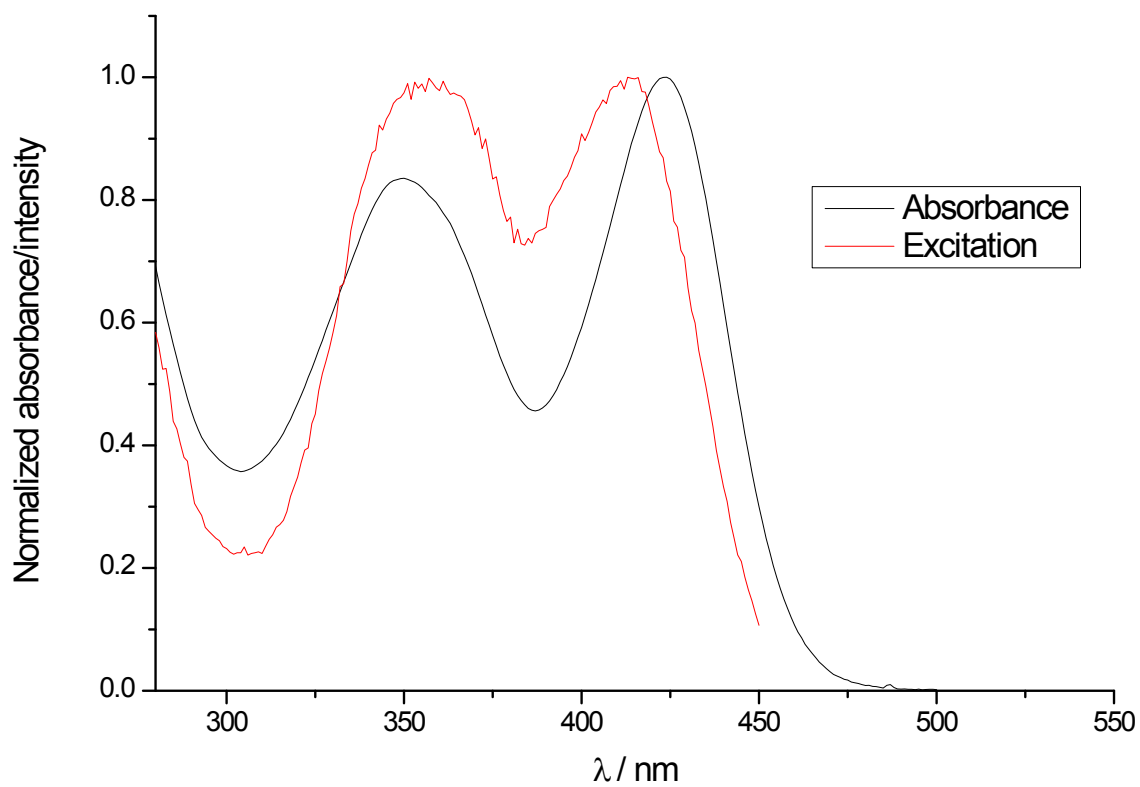

Figure S29 Normalized absorption and excitation spectra of **Sm-1** in 1,2-dichloroethane

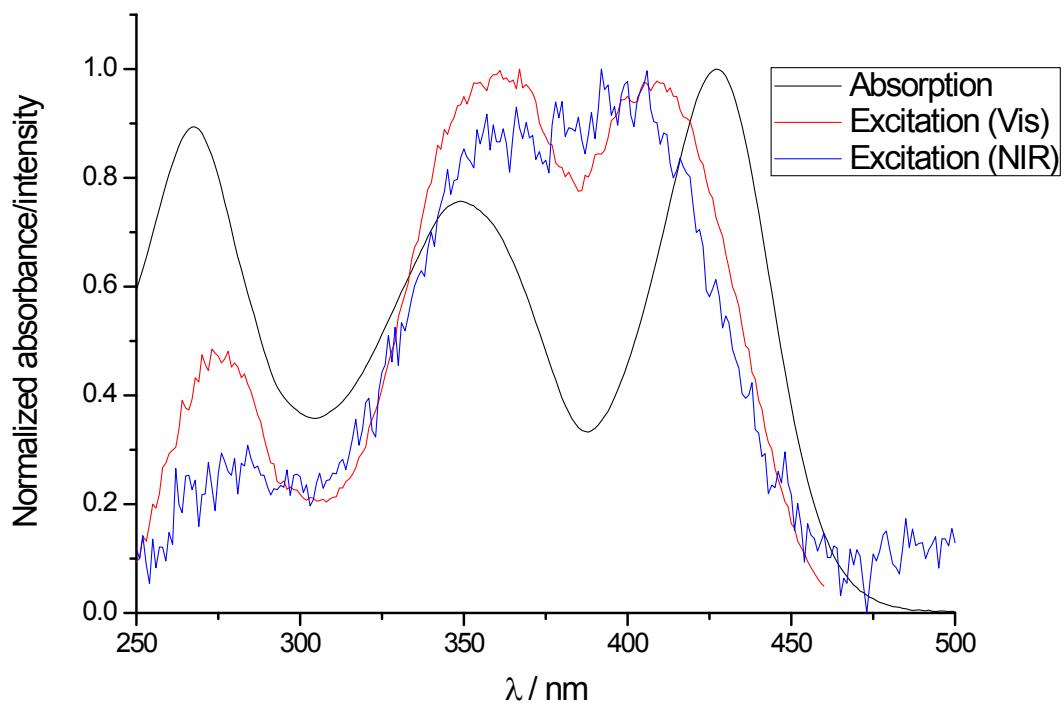

Figure S30 Normalized absorption and excitation spectra of **Sm-1** in dichloromethane

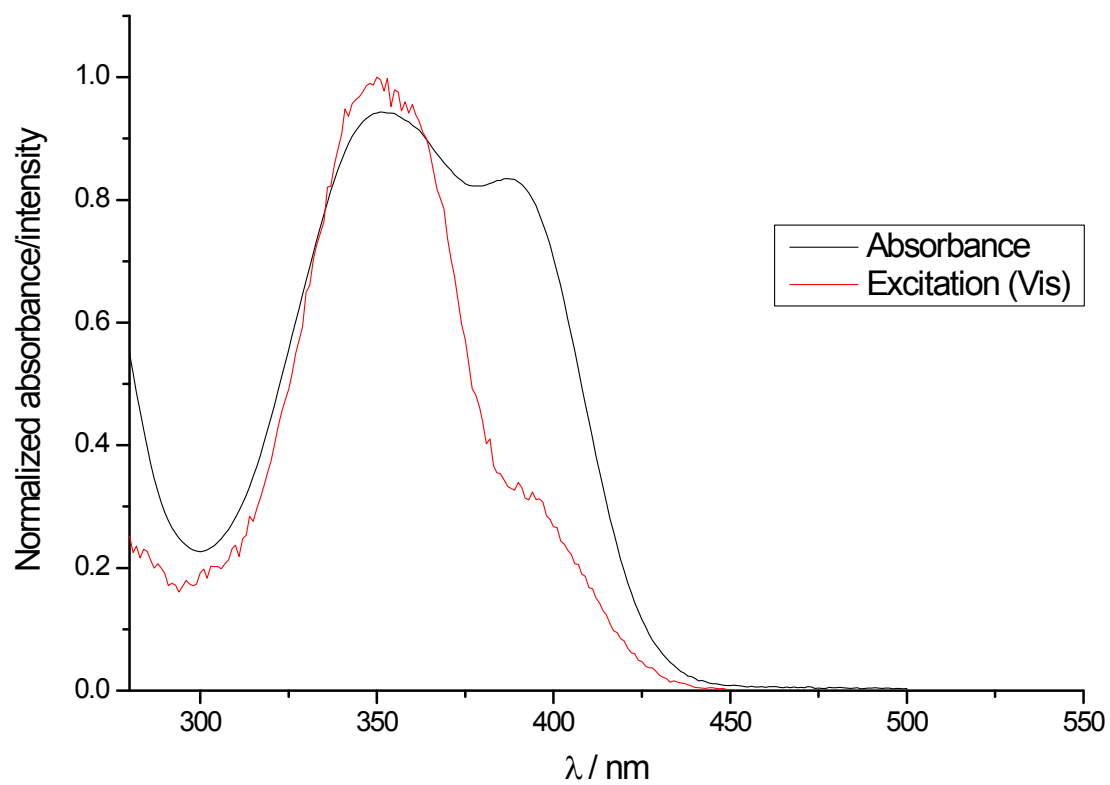

Figure S31 Normalized absorption and excitation spectra of **Sm-1** in DMSO

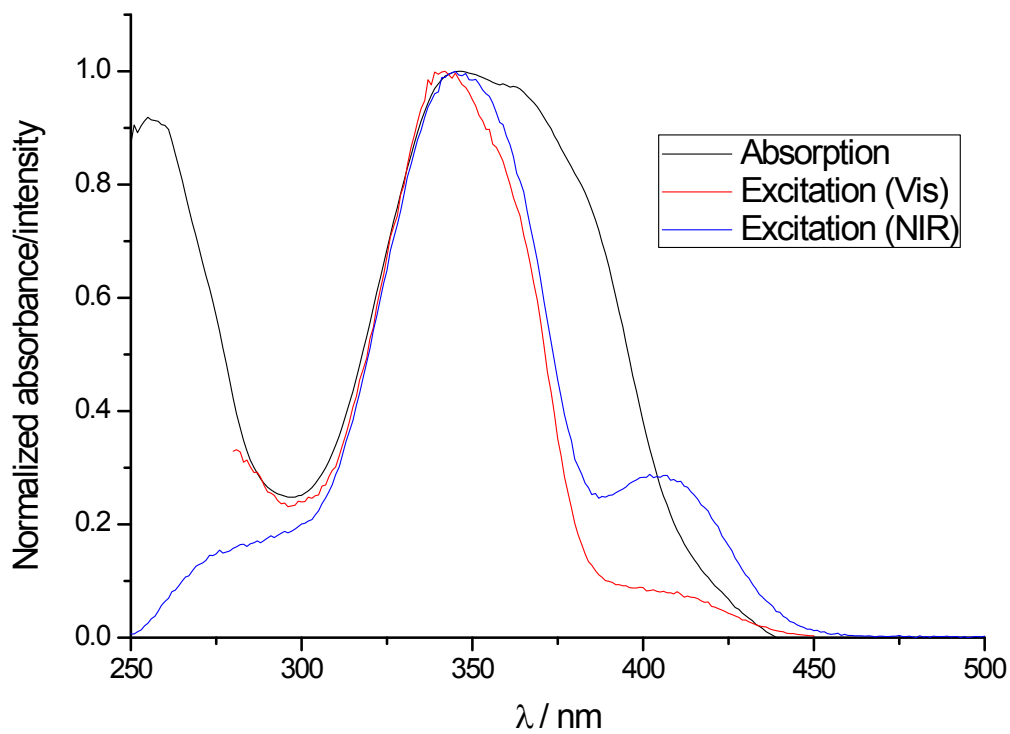

Figure S32 Normalized absorption and excitation spectra of **Sm-1** in ethyl acetate

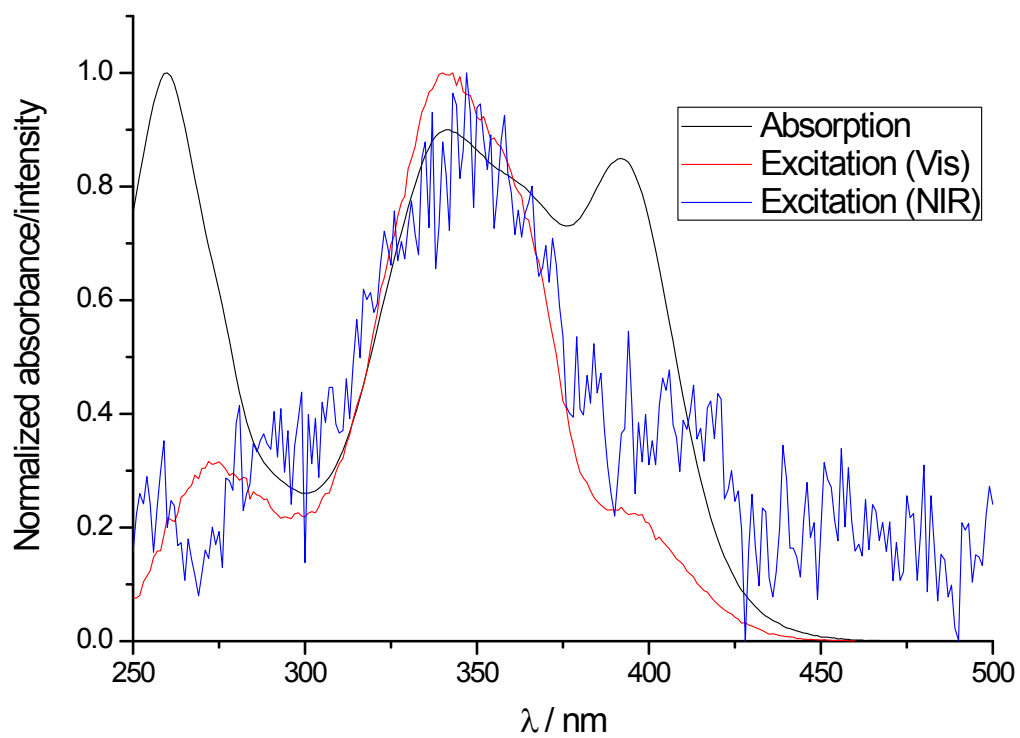

Figure S33 Normalized absorption and excitation spectra of **Sm-1** in isopropanol

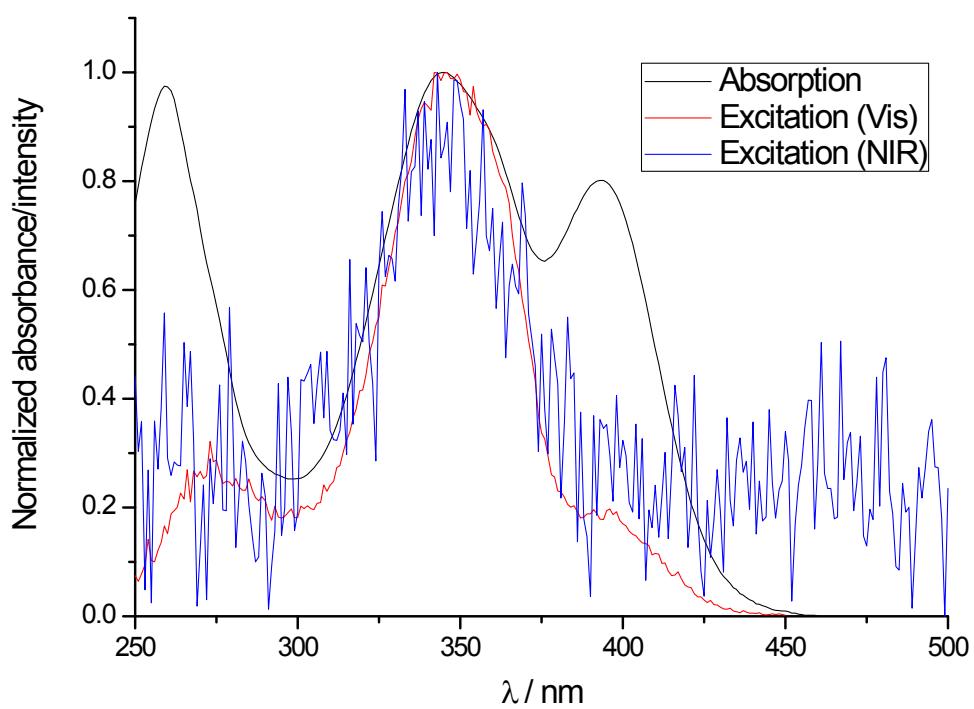

Figure S34 Normalized absorption and excitation spectra of **Sm-1** in methanol

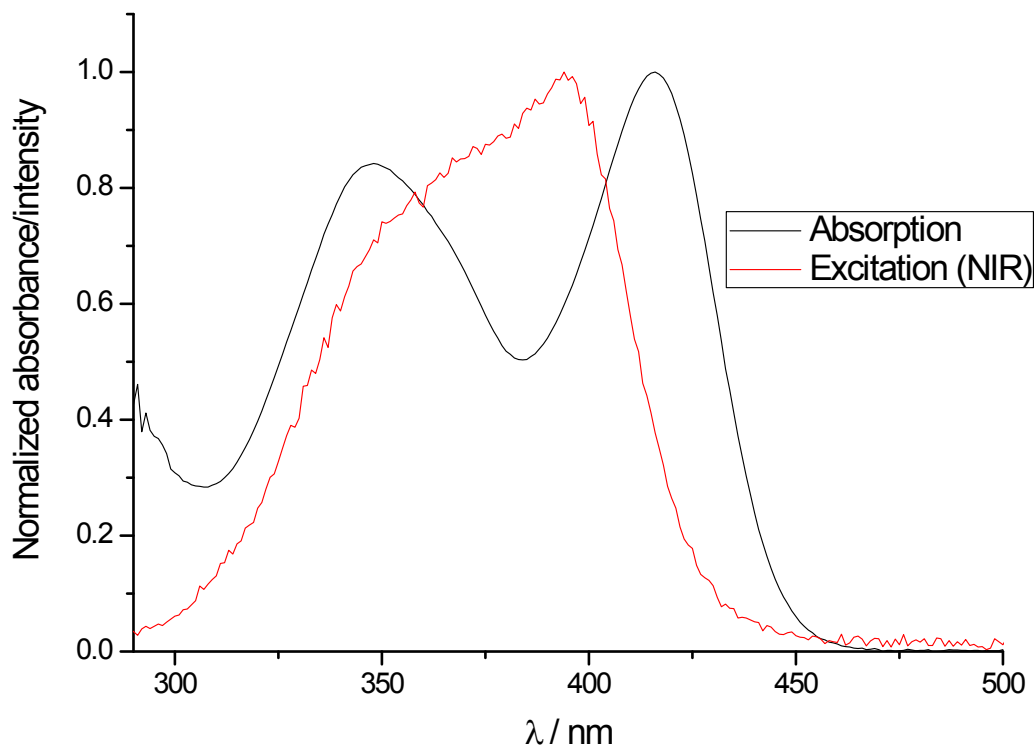

Figure S35 Normalized absorption and excitation spectra of **Sm-1** in fluorobenzene

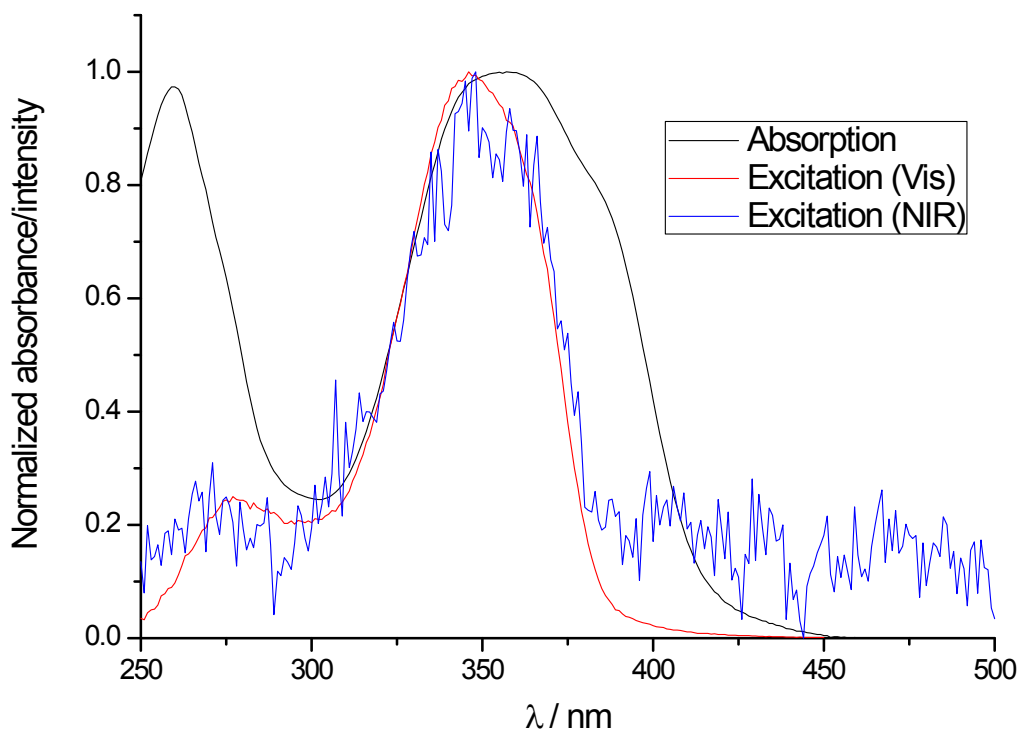

Figure S36 Normalized absorption and excitation spectra of **Sm-1** in tetrahydrofuran

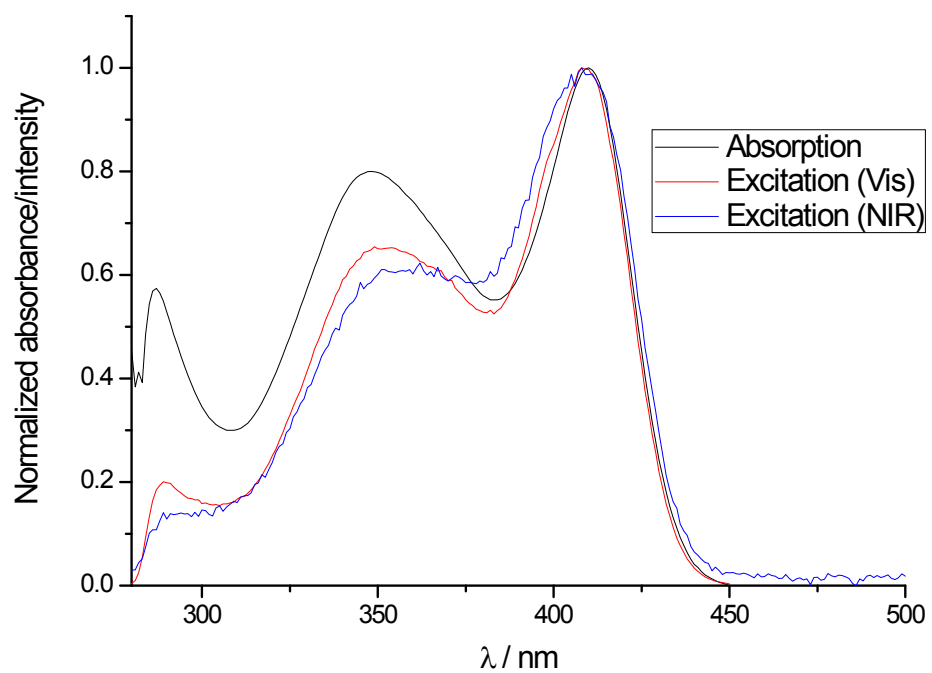

Figure S37 Normalized absorption and excitation spectra of **Sm-1** in toluene

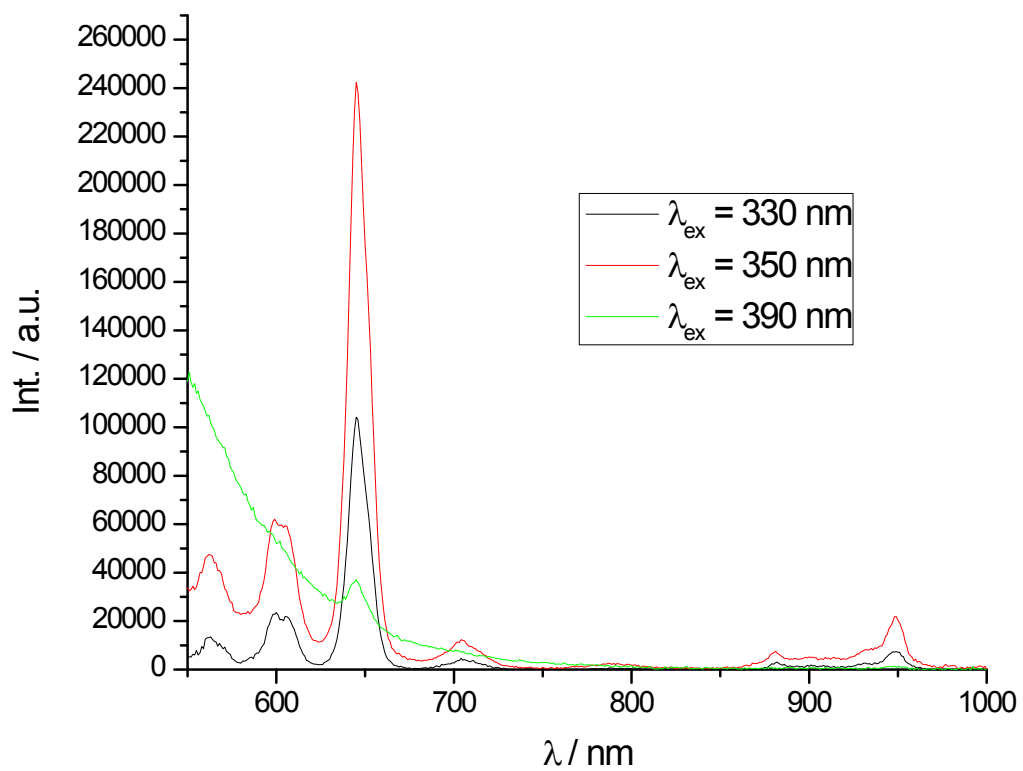

Figure S38 Emission spectra of **Sm-1** in acetone

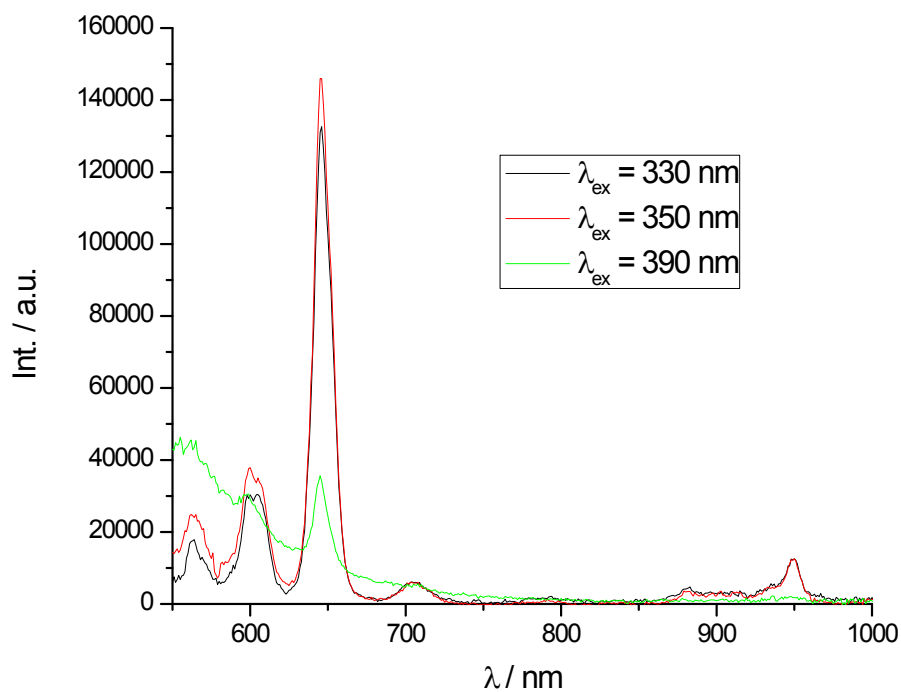

Figure S39 Emission spectra of **Sm-1** in acetonitrile

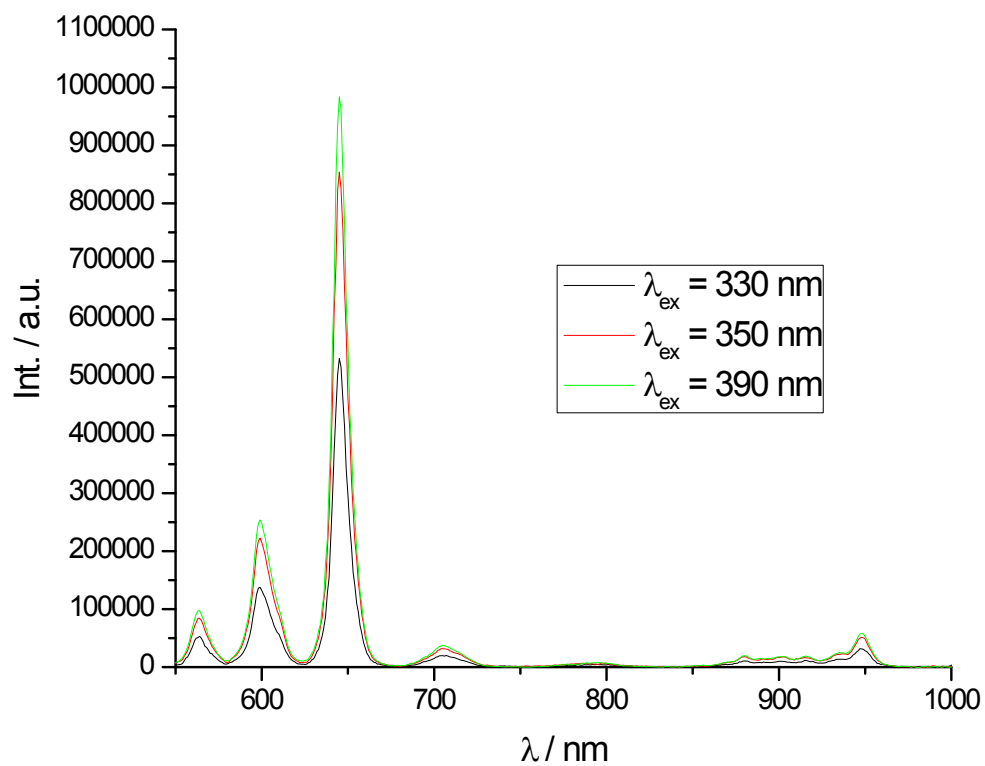

Figure S40 Emission spectra of **Sm-1** in benzene

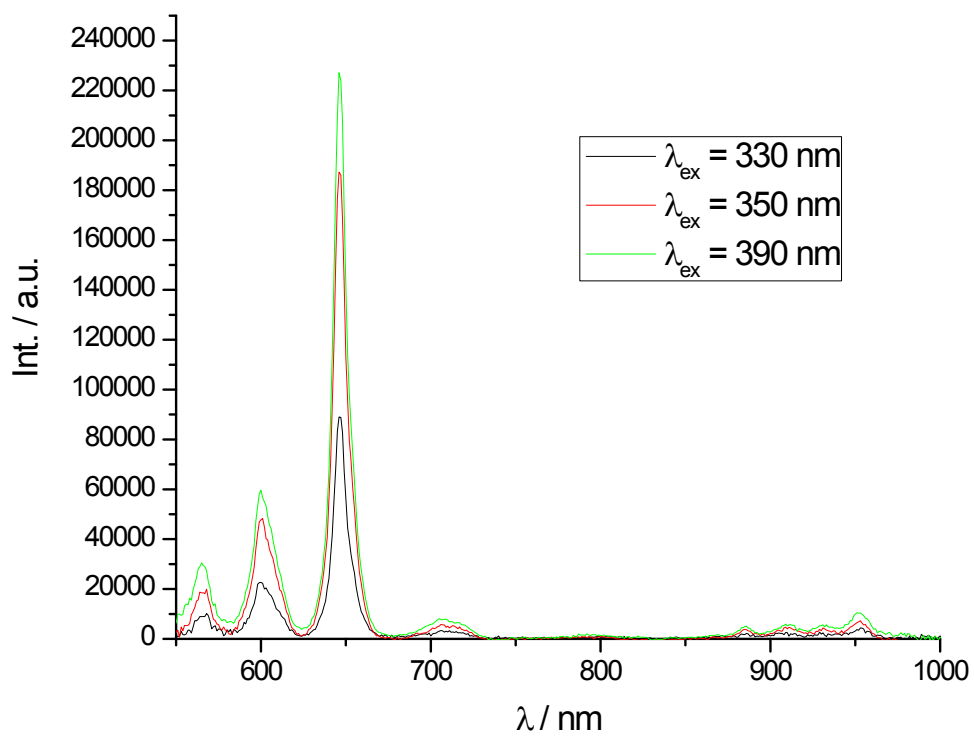

Figure S41 Emission spectra of **Sm-1** in chloroform

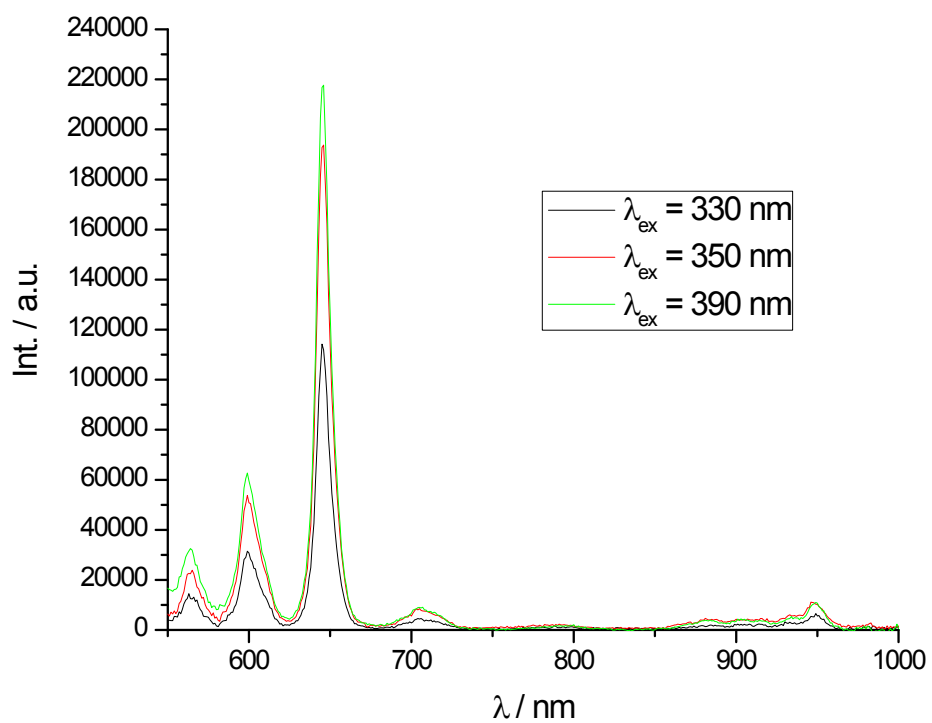

Figure S42 Emission spectra of **Sm-1** in dichloromethane



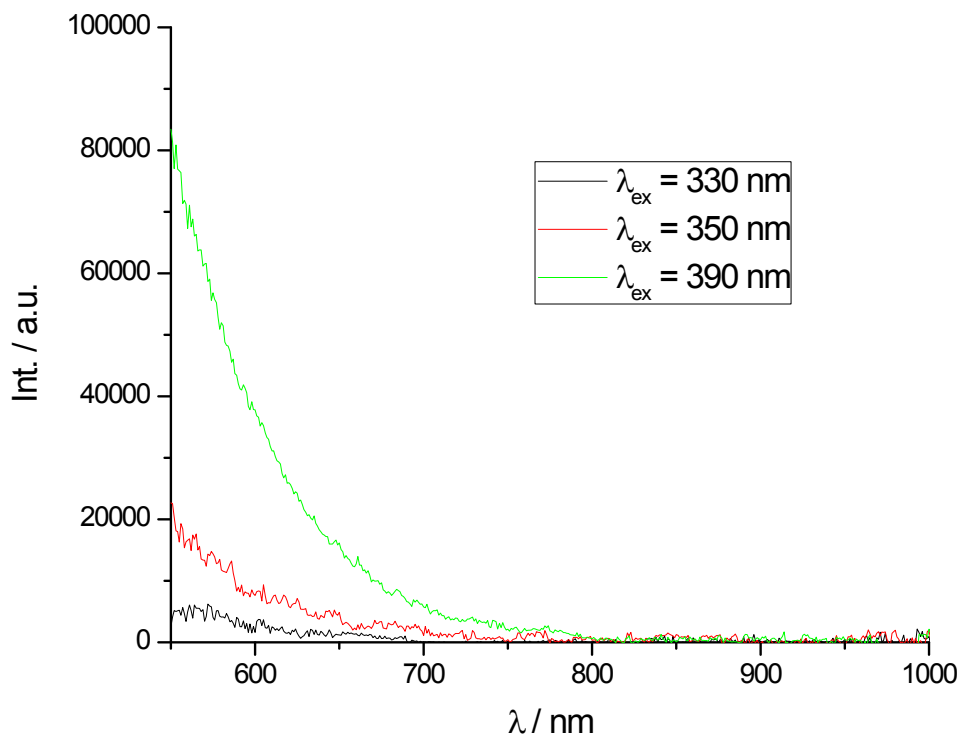

Figure S43 Emission spectra of **Sm-1** in DMF

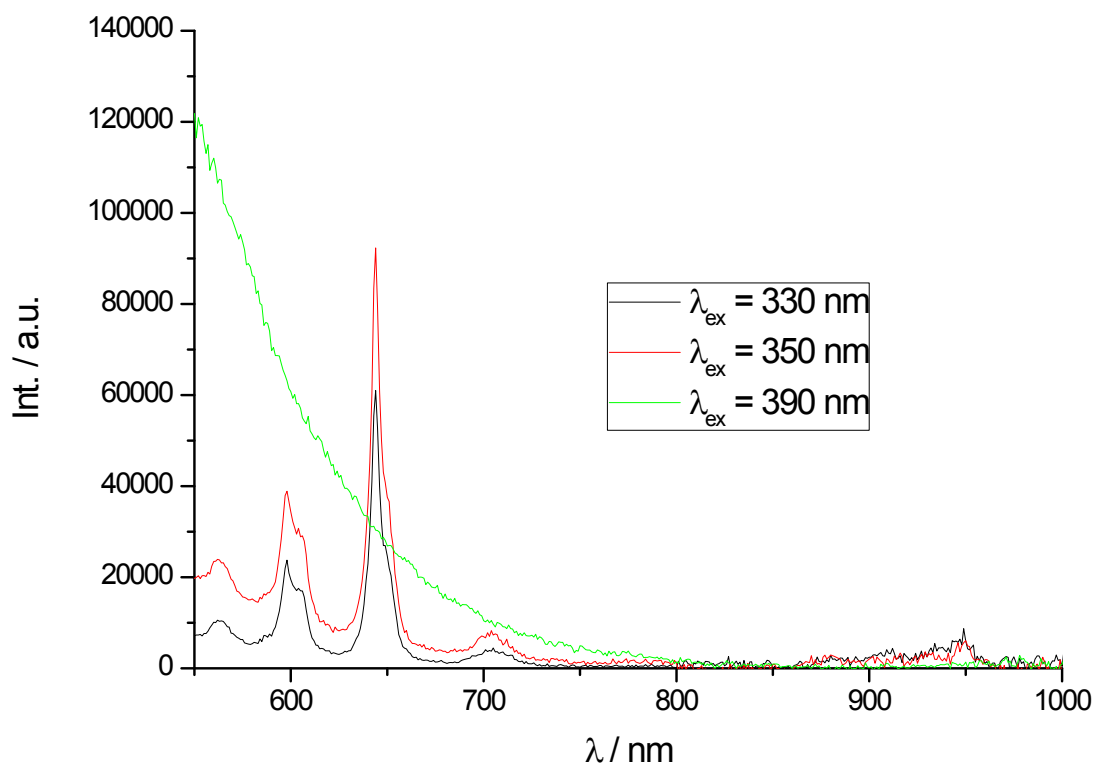

Figure S44 Emission spectra of **Sm-1** in DMSO

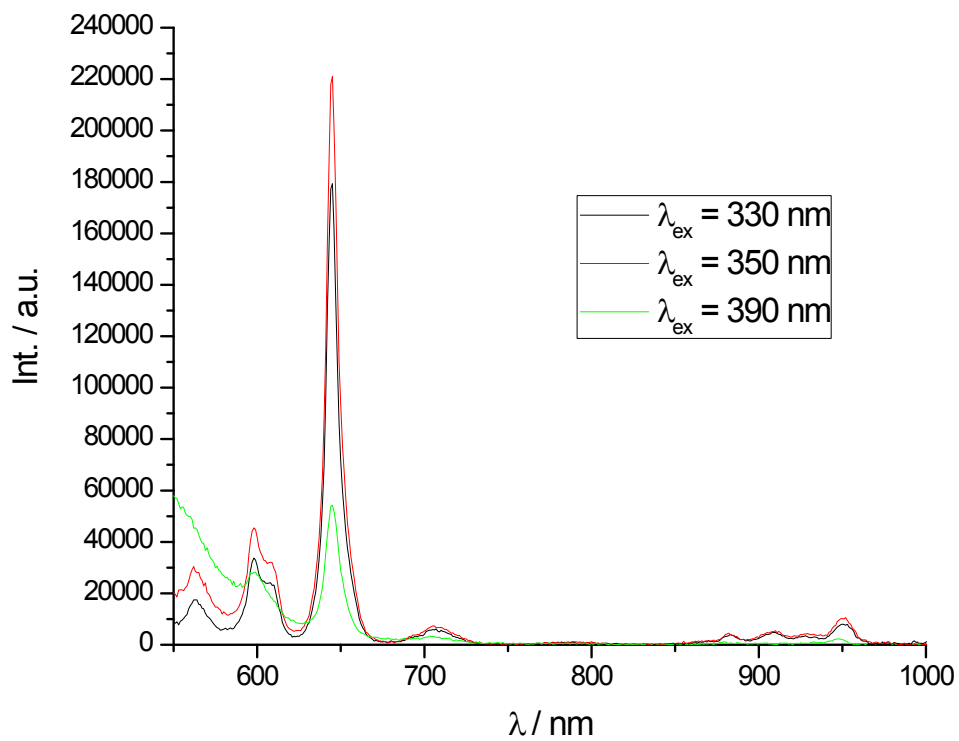

Figure S45 Emission spectra of **Sm-1** in ethyl acetate

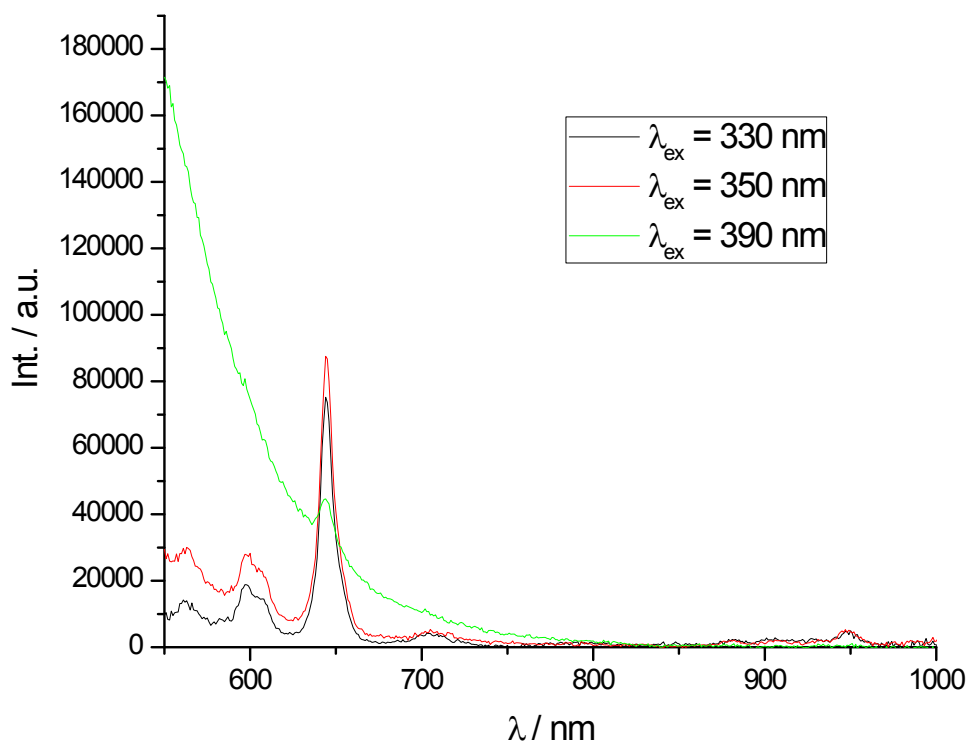

Figure S46 Emission spectra of **Sm-1** in isopropanol

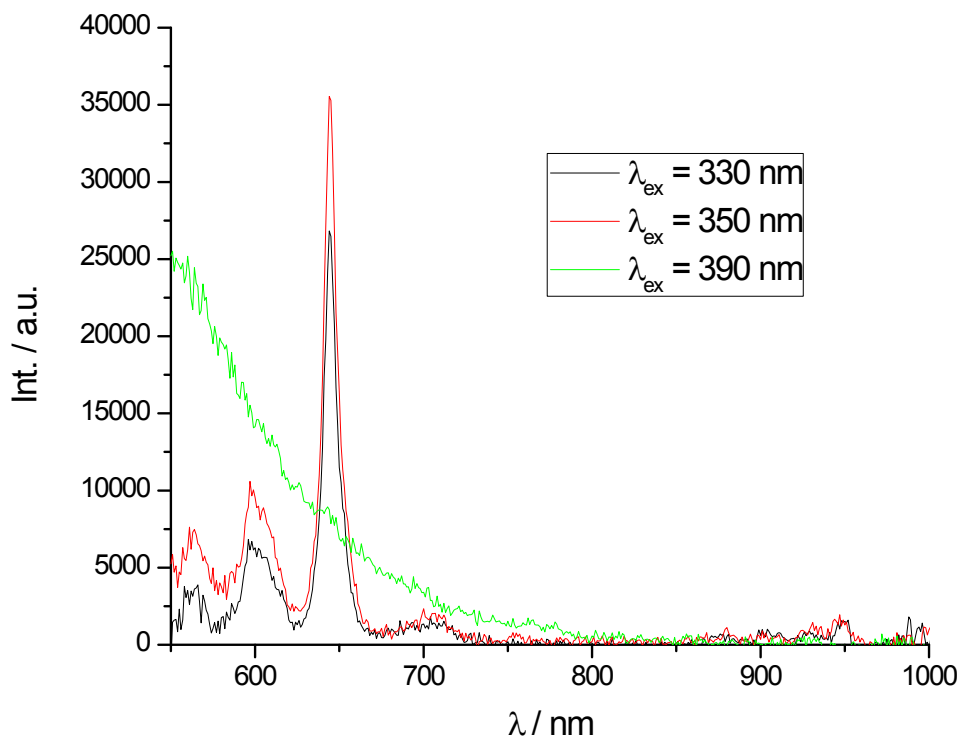

Figure S47 Emission spectra of **Sm-1** in methanol

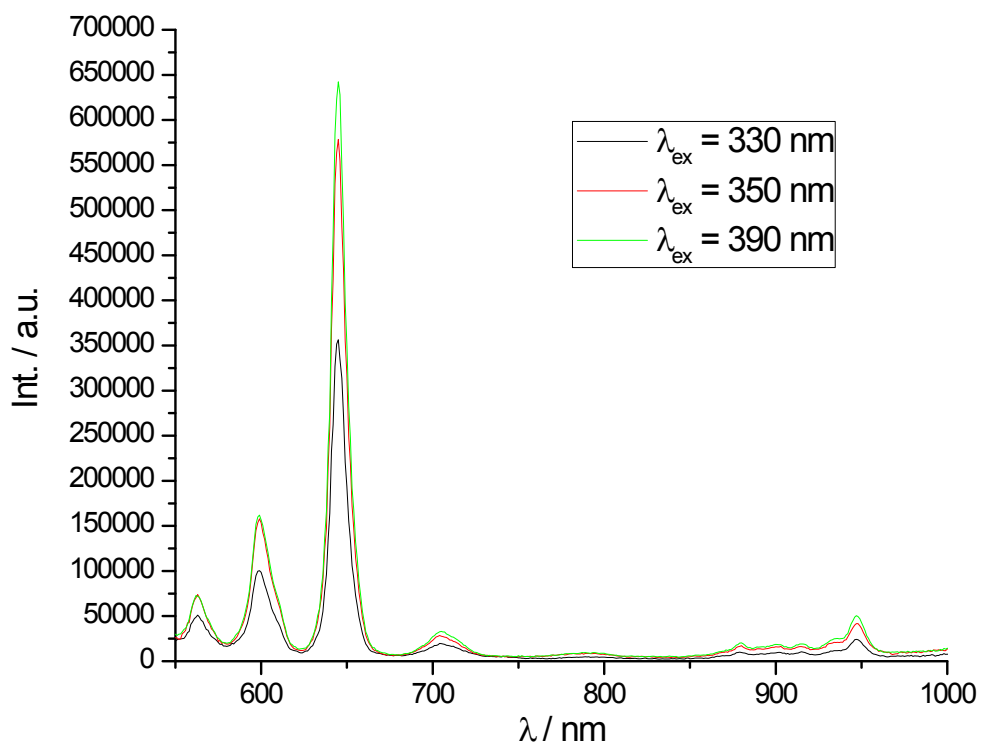

Figure S48 Emission spectra of **Sm-1** in fluorobenzene

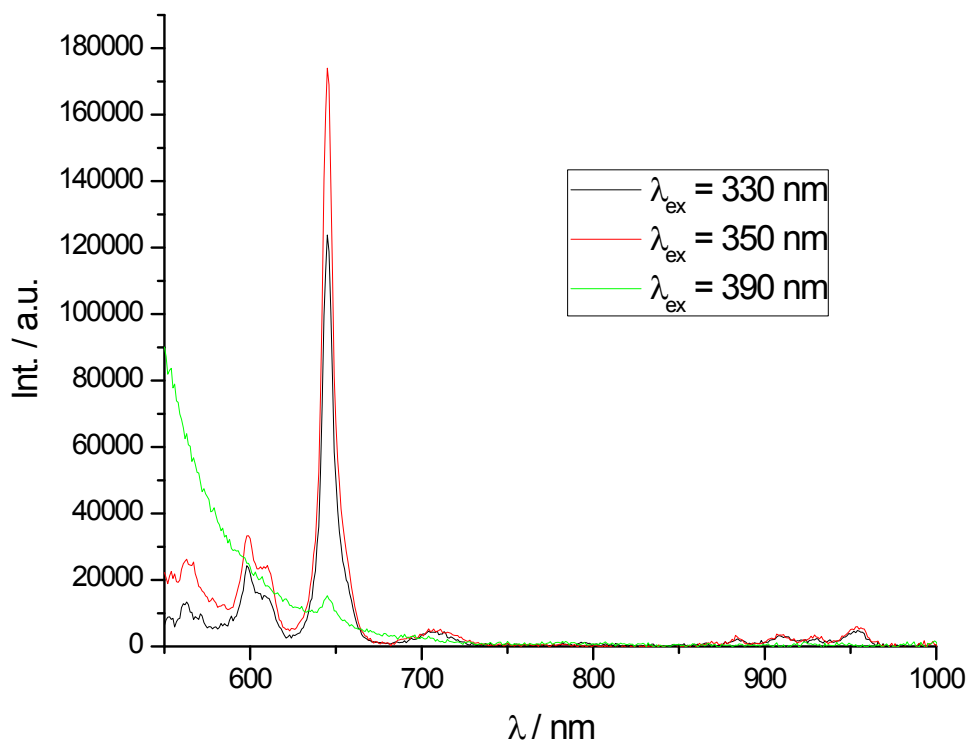

Figure S49 Emission spectra of **Sm-1** in tetrahydrofuran

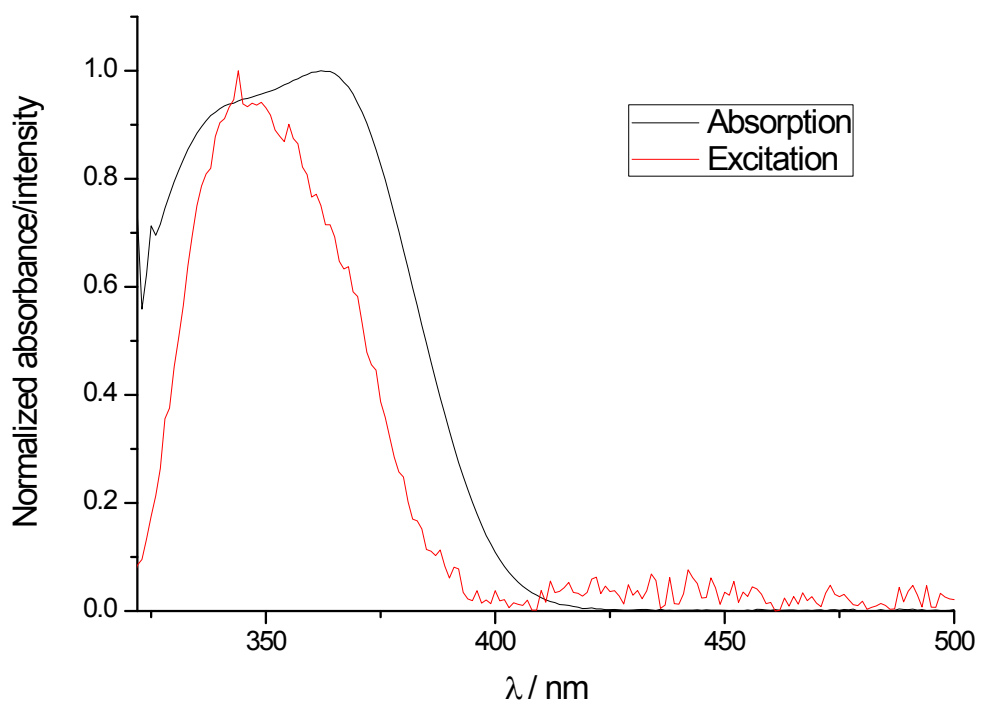

Figure S50 Normalized absorption and excitation spectra of **Yb-1** in acetone

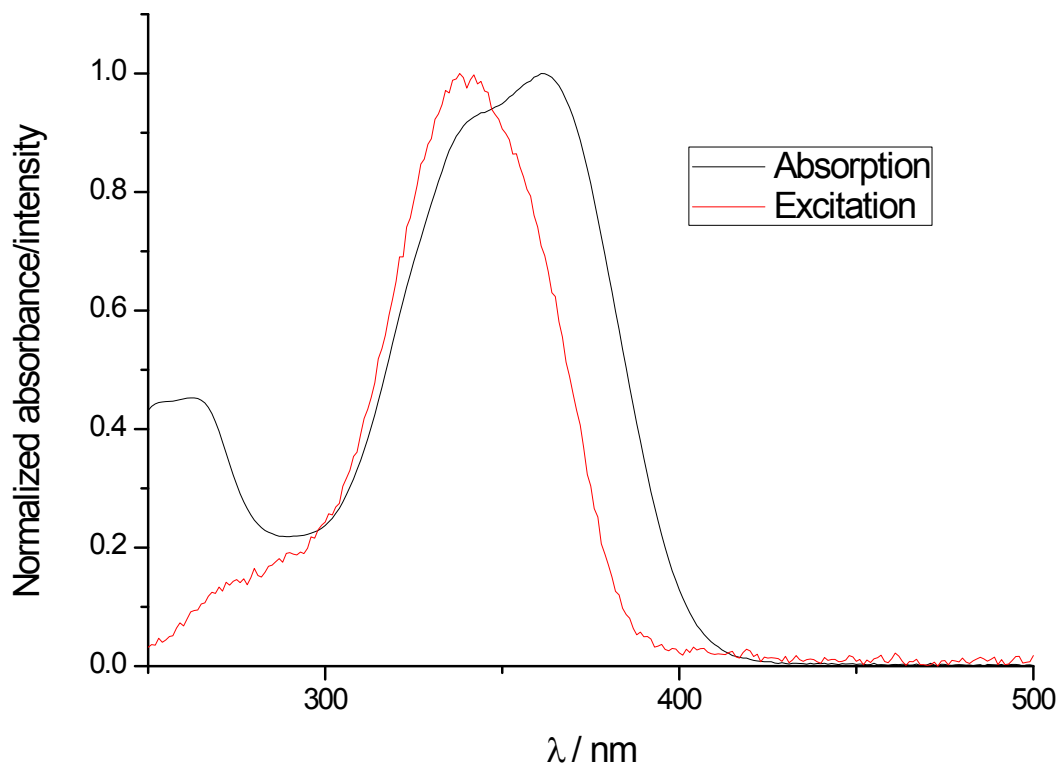

Figure S51 Normalized absorption and excitation spectra of **Yb-1** in acetonitrile

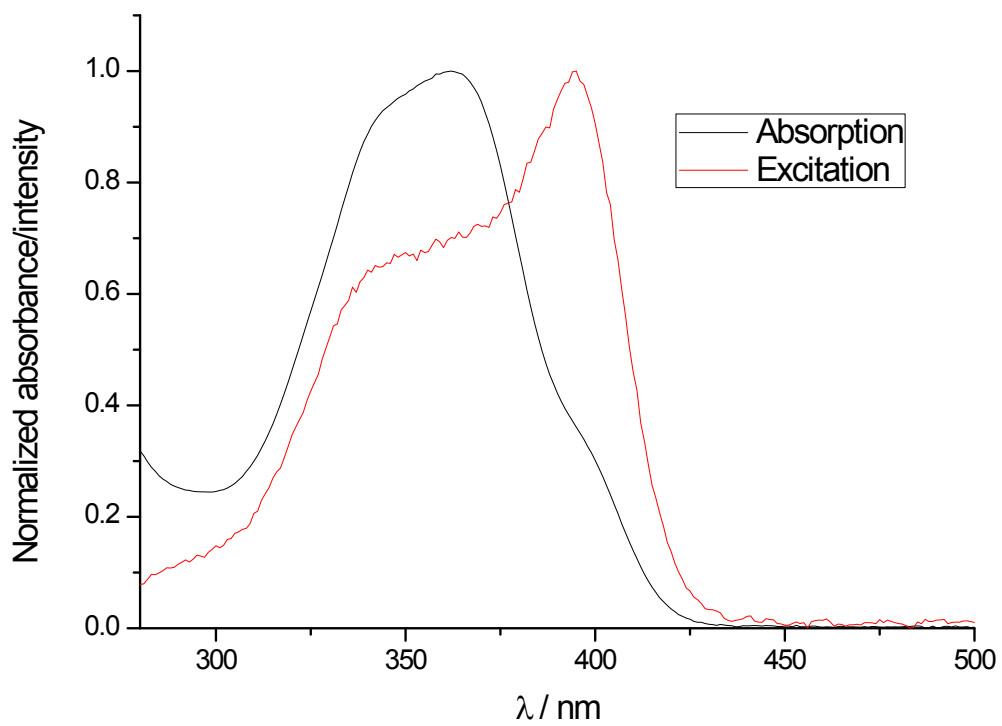

Figure S52 Normalized absorption and excitation spectra of **Yb-1** in benzene

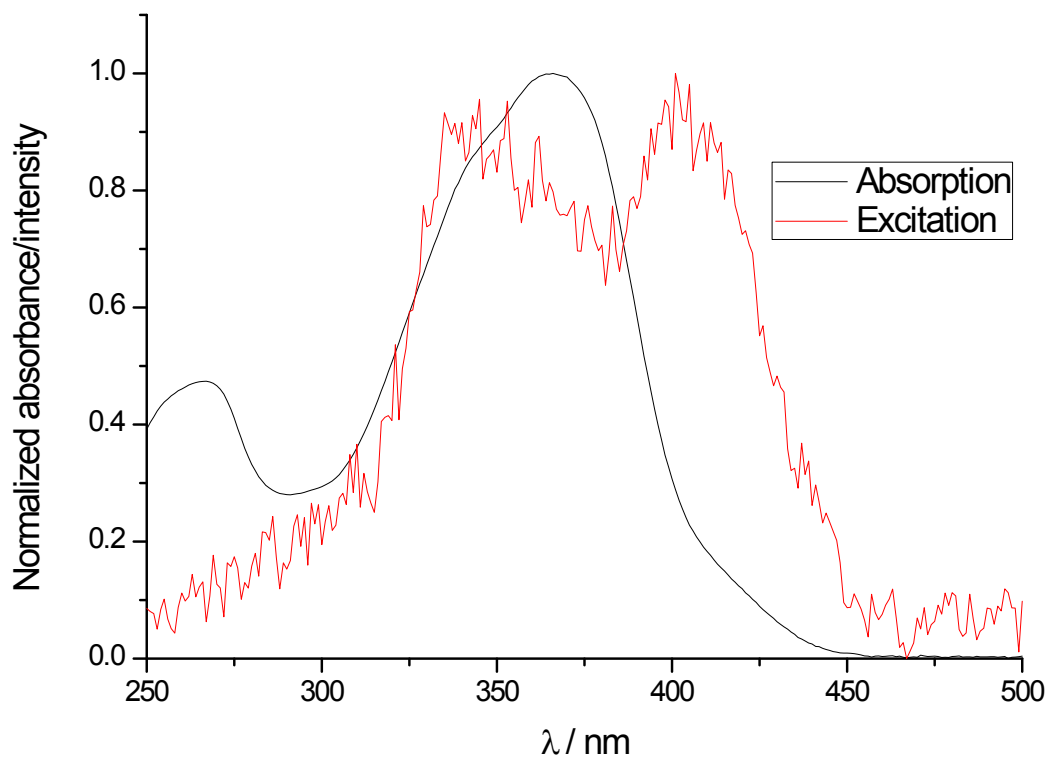

Figure S53 Normalized absorption and excitation spectra of **Yb-1** in chloroform

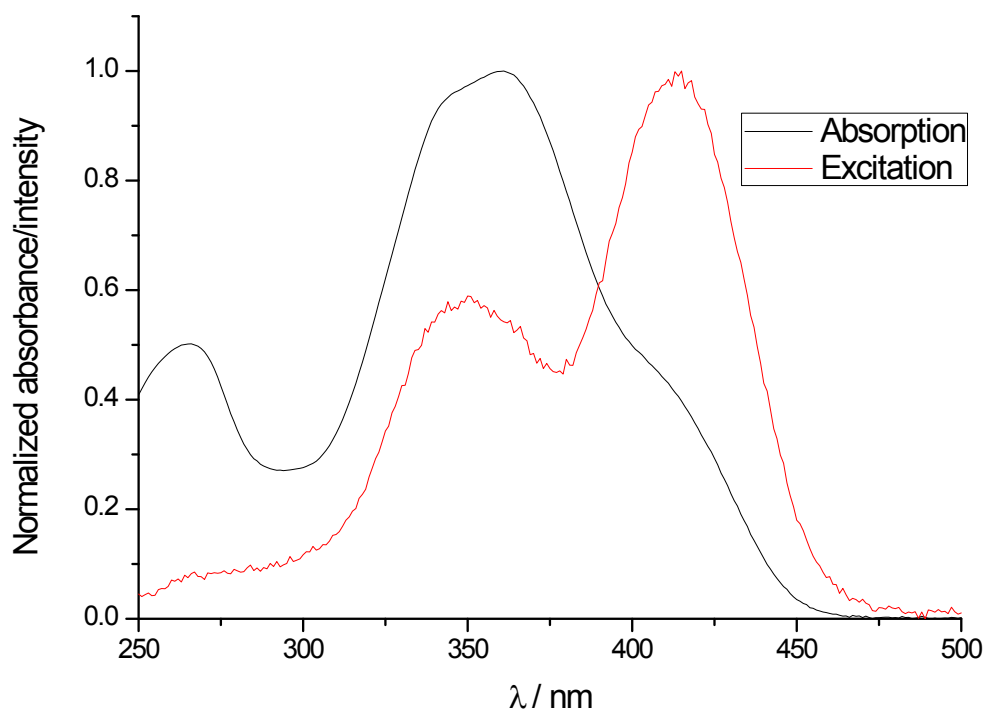

Figure S54 Normalized absorption and excitation spectra of **Yb-1** in dichloromethane

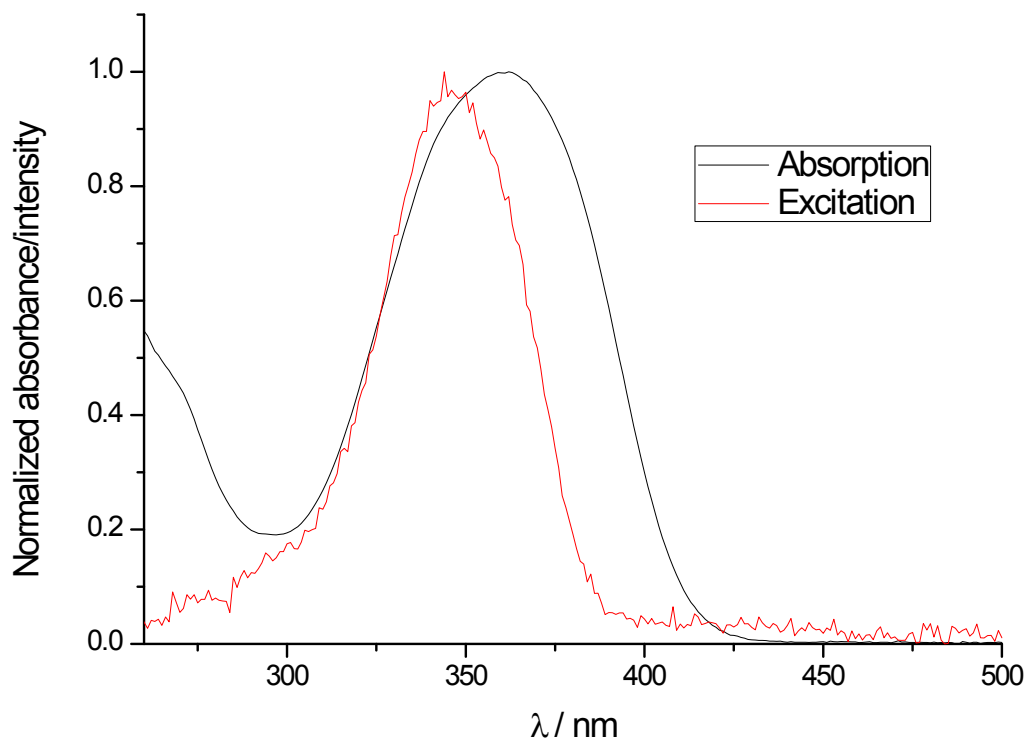

Figure S55 Normalized absorption and excitation spectra of **Yb-1** in DMSO

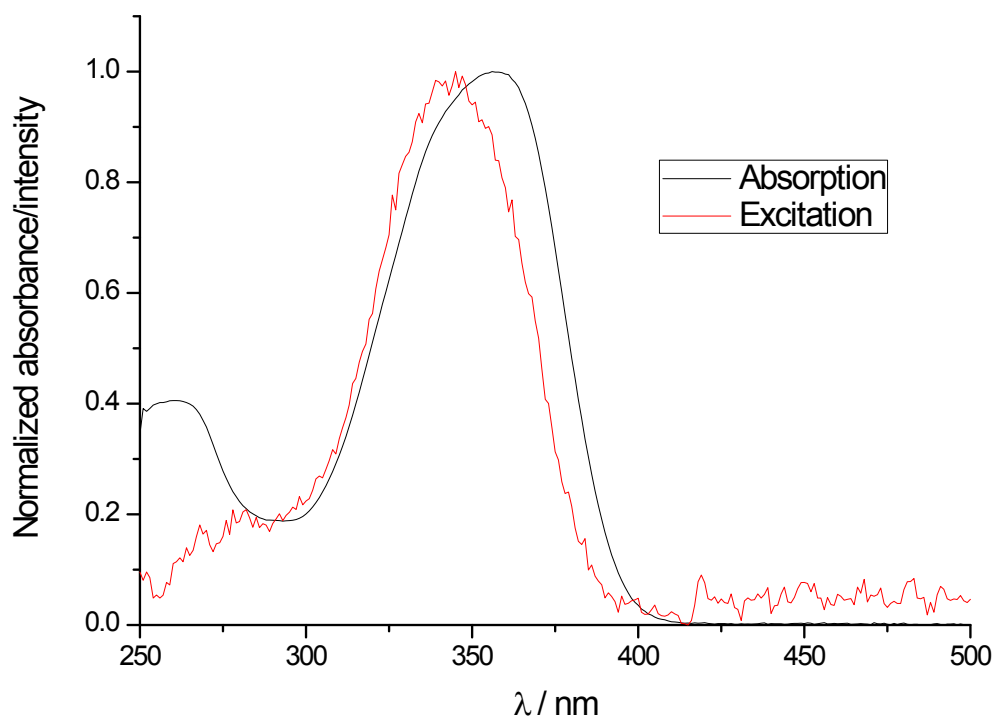

Figure S56 Normalized absorption and excitation spectra of **Yb-1** in ethyl acetate

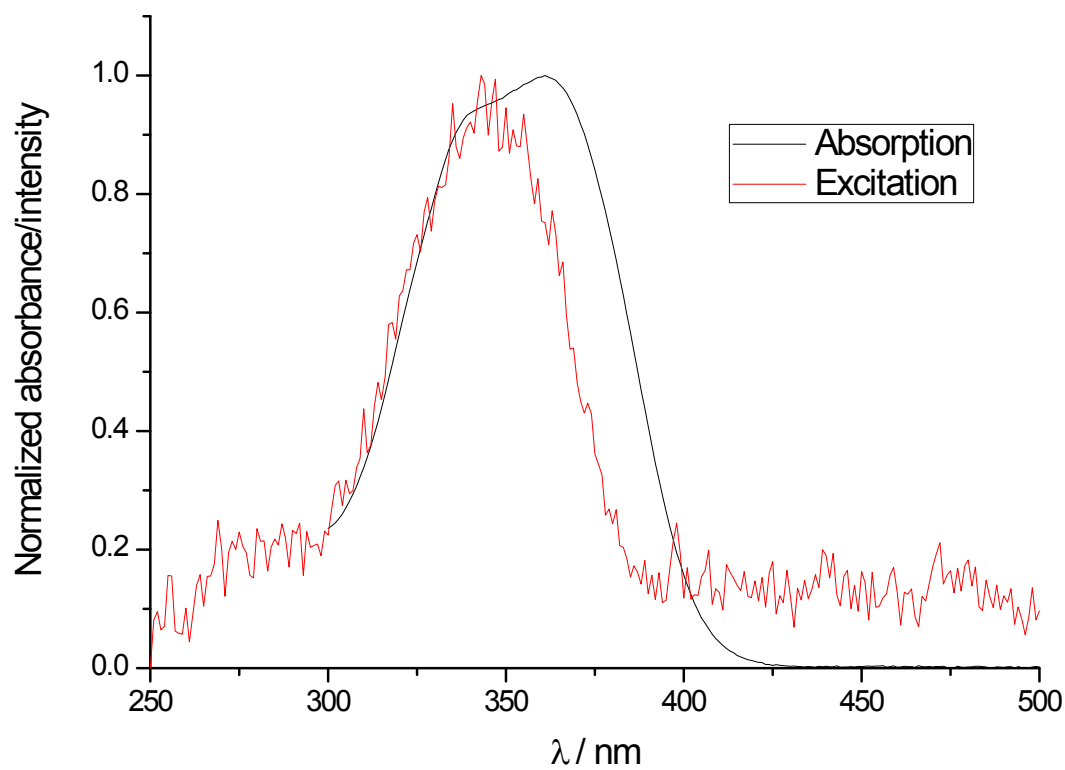

Figure S57 Normalized absorption and excitation spectra of **Yb-1** in isopropanol

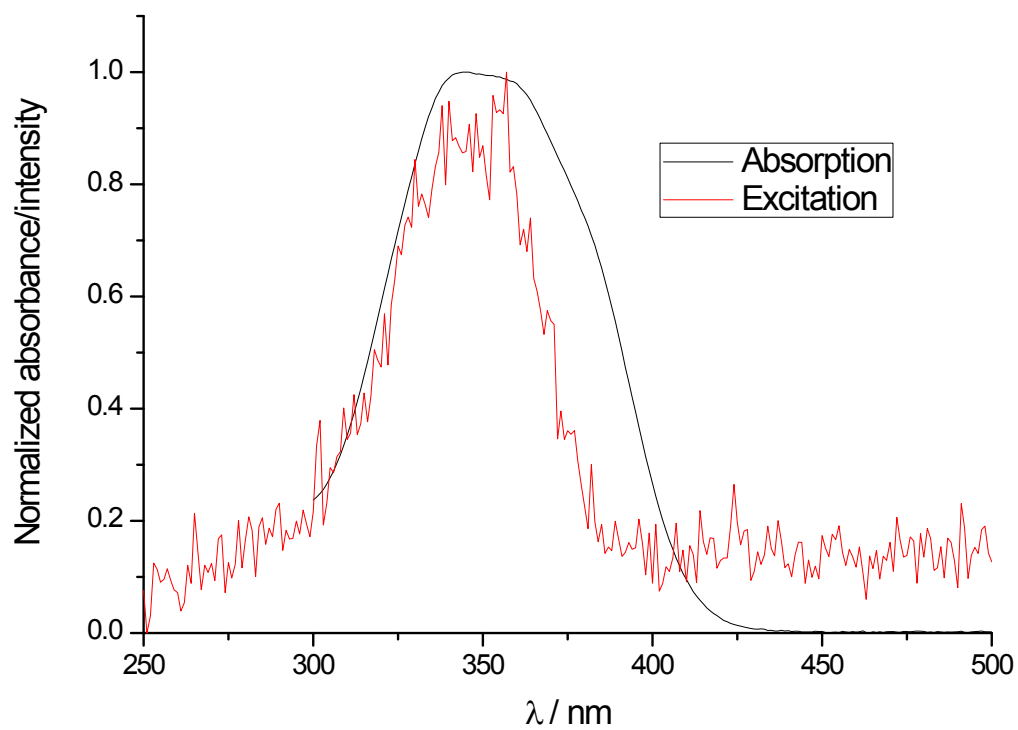

Figure S58 Normalized absorption and excitation spectra of **Yb-1** in methanol



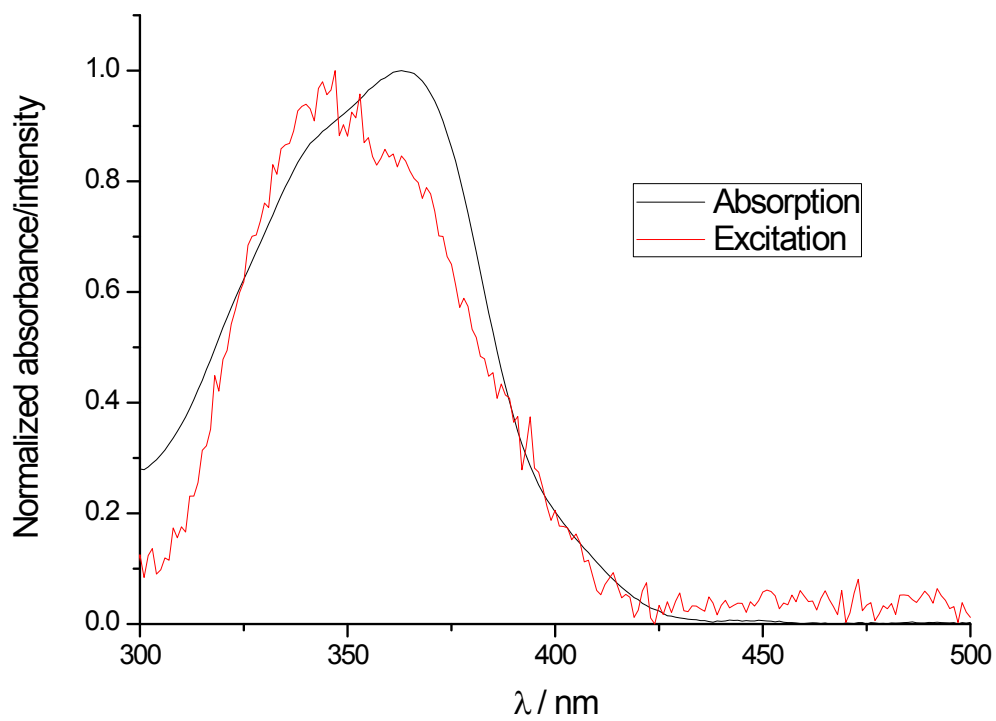

Figure S59 Normalized absorption and excitation spectra of **Yb-1** in fluorobenzene

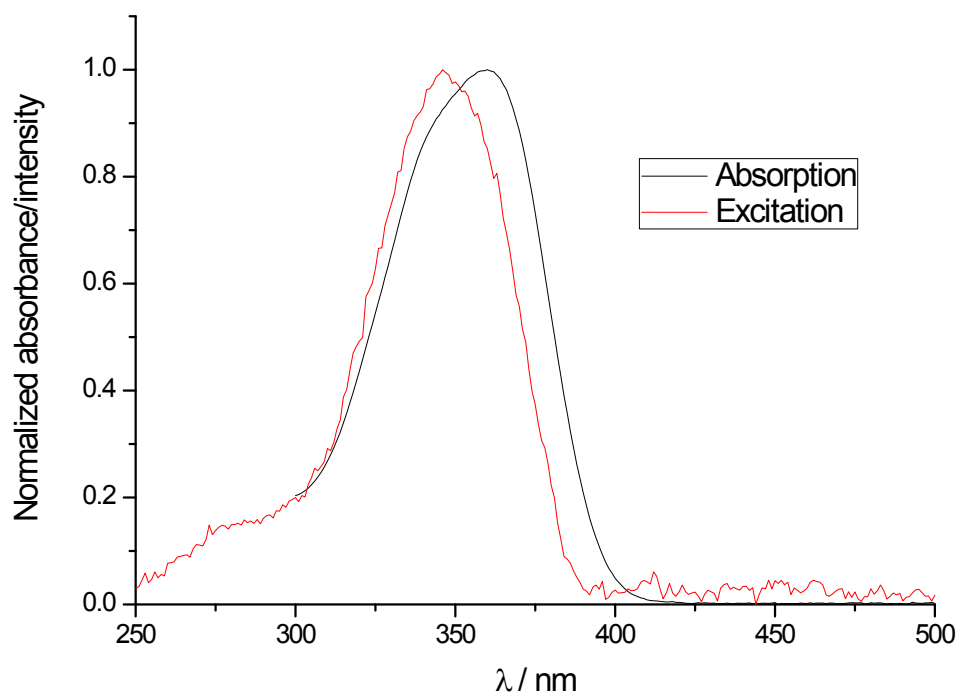

Figure S60 Normalized absorption and excitation spectra of **Yb-1** in tetrahydrofuran

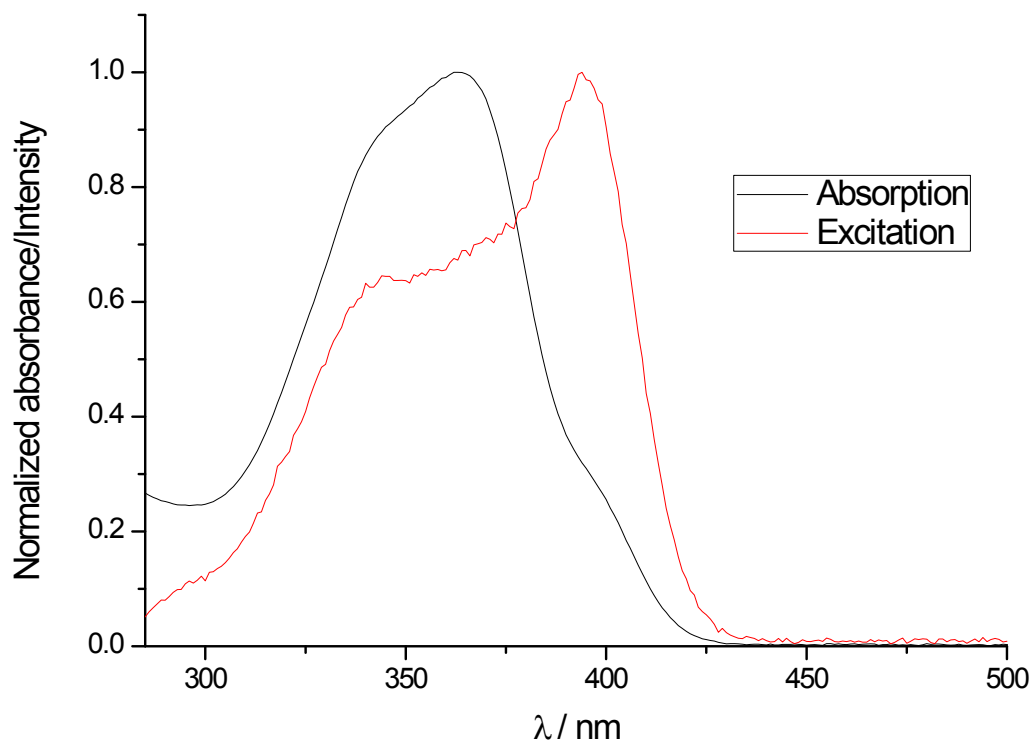

Figure S61 Normalized absorption and excitation spectra of **Yb-1** in toluene

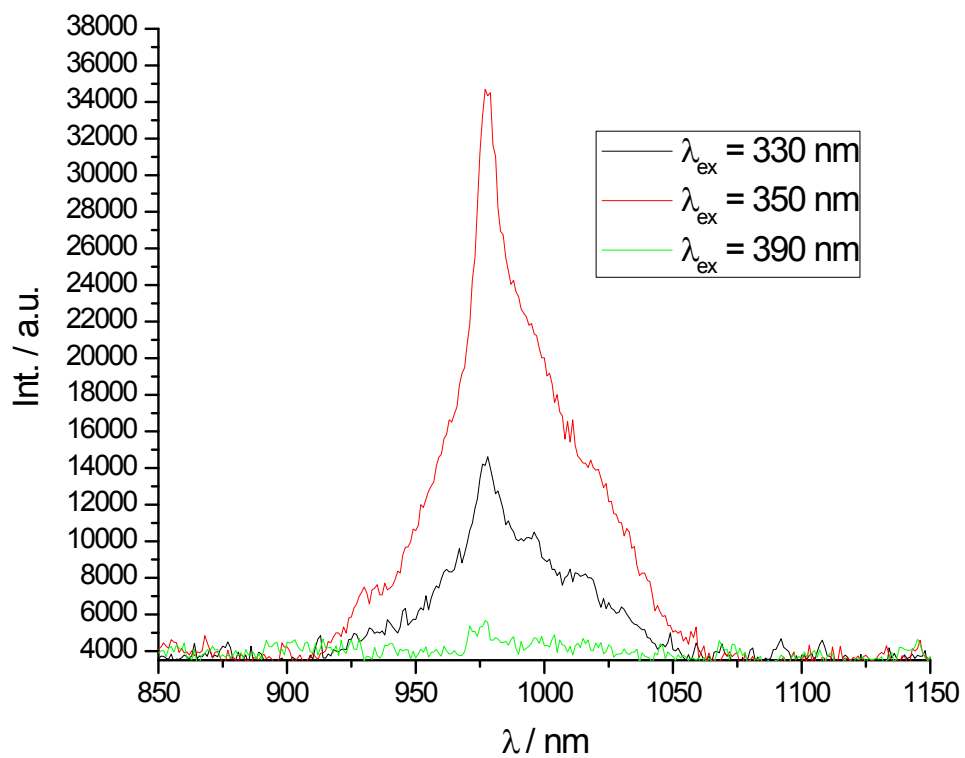

Figure S62 Emission spectra of **Yb-1** in acetone

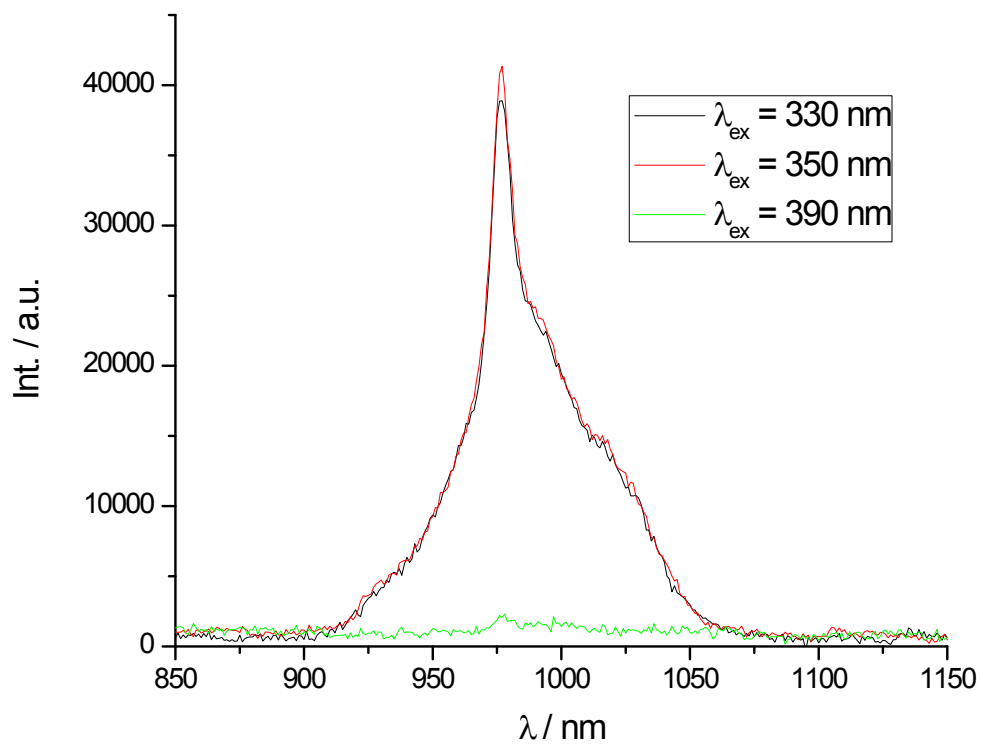

Figure S63 Emission spectra of **Yb-1** in acetonitrile

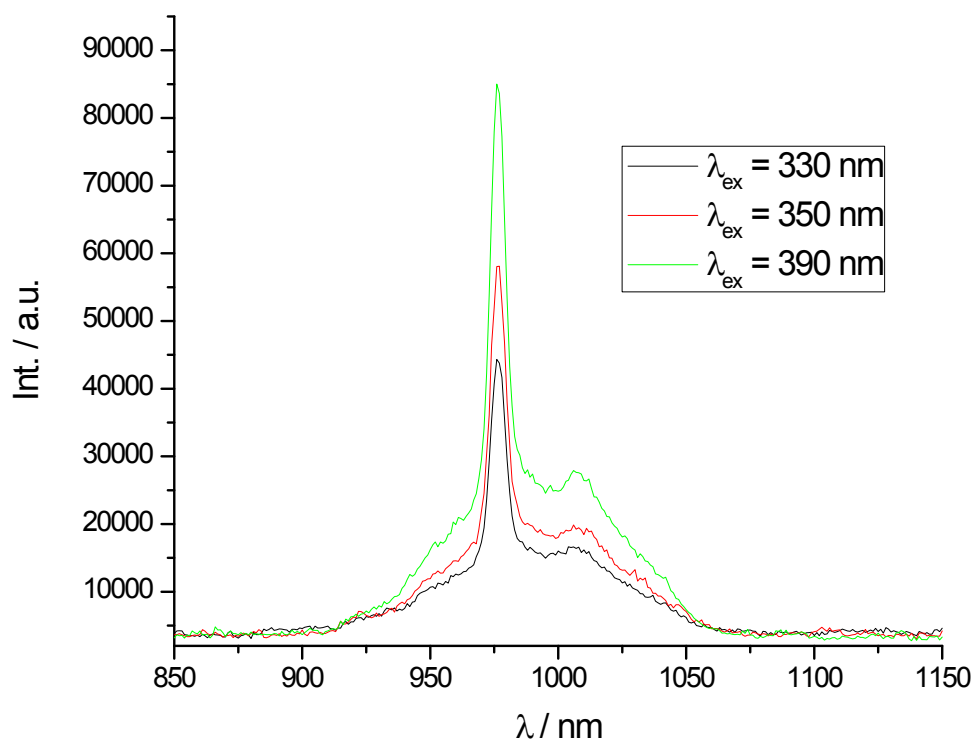

Figure S64 Emission spectra of **Yb-1** in benzene

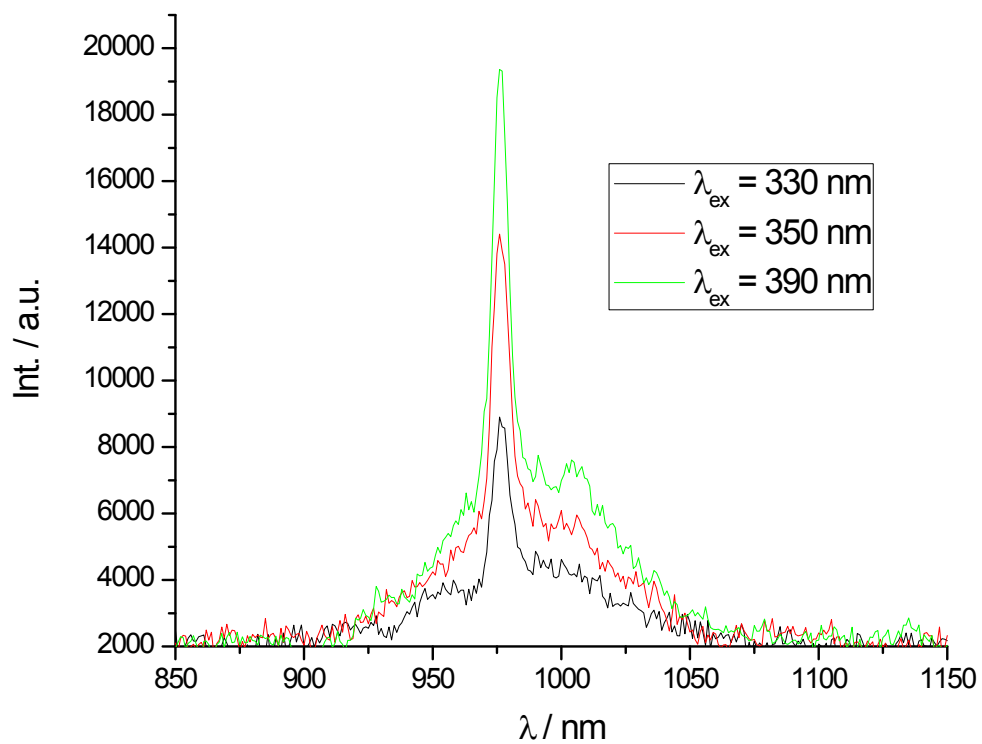

Figure S65 Emission spectra of **Yb-1** in chloroform

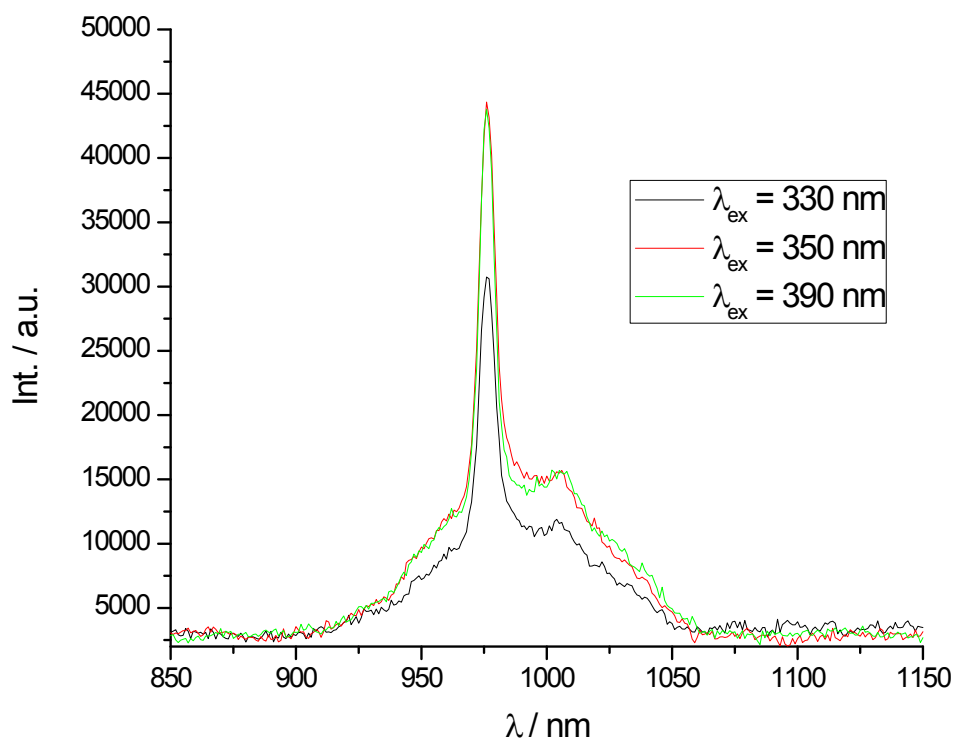

Figure S66 Emission spectra of **Yb-1** in dichloromethane

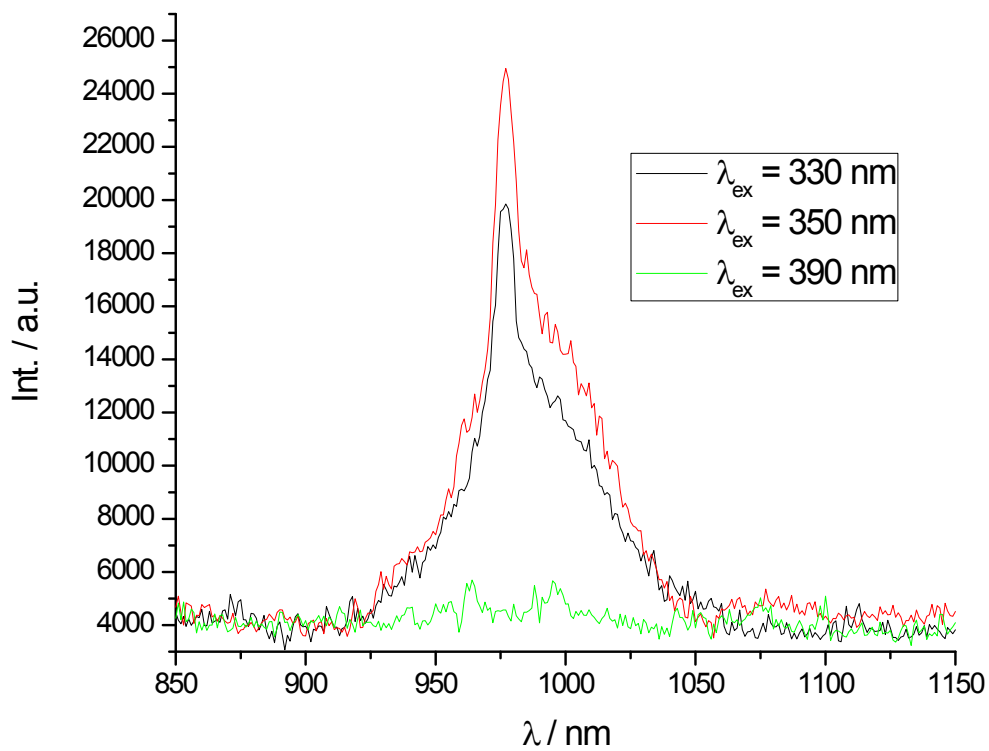

Figure S67 Emission spectra of **Yb-1** in DMSO

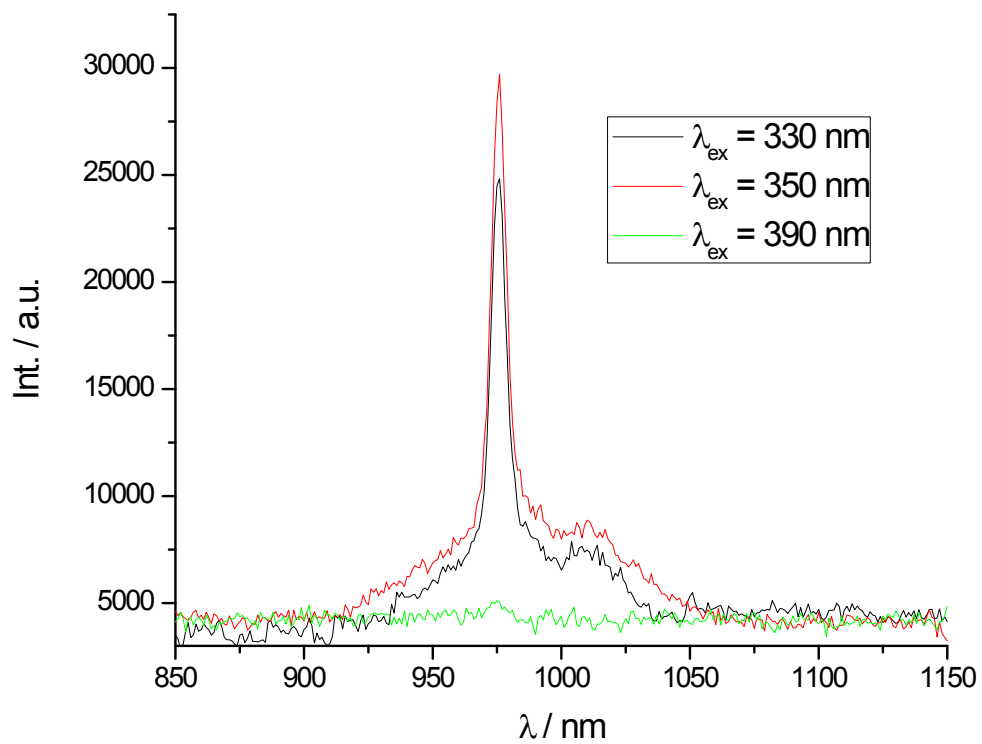

Figure S68 Emission spectra of **Yb-1** in ethyl acetate

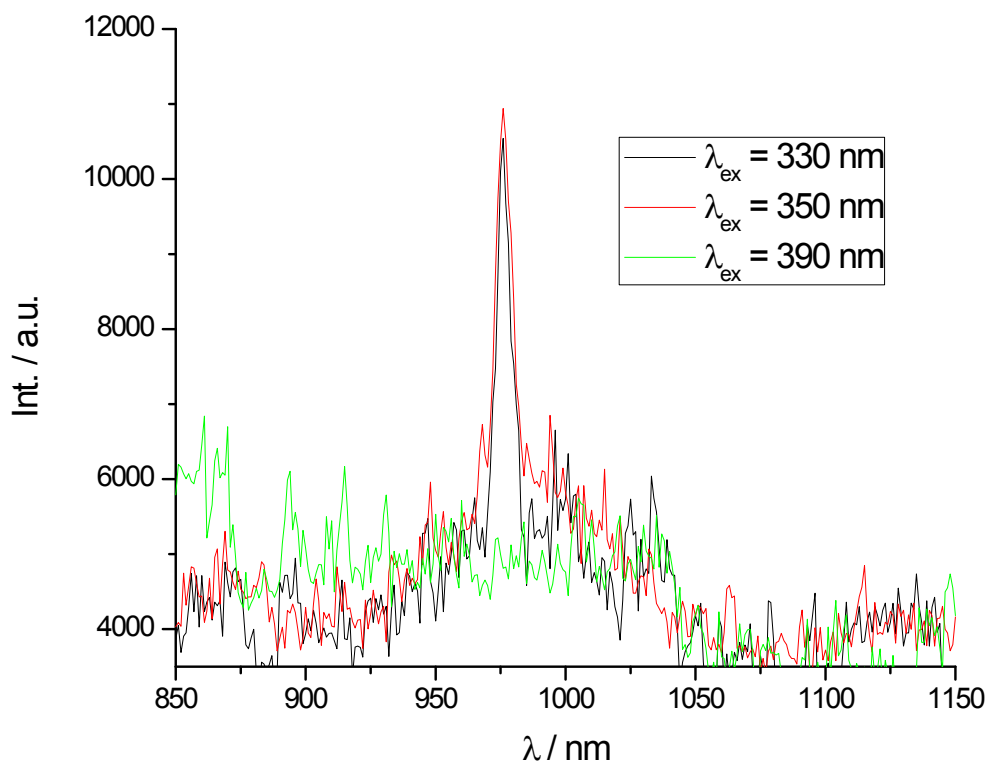

Figure S69 Emission spectra of **Yb-1** in isopropanol

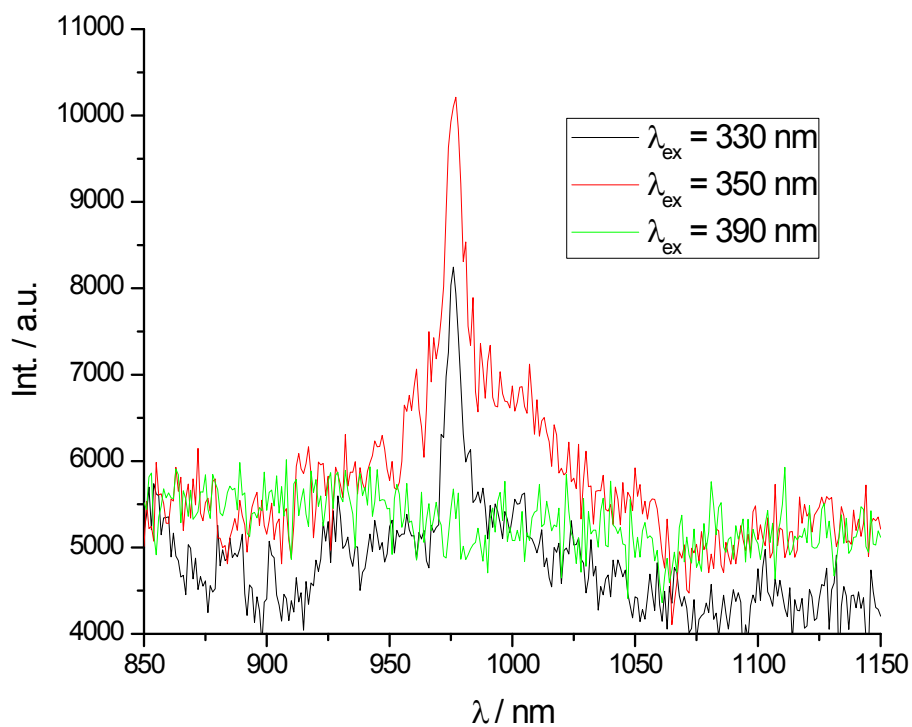

Figure S70 Emission spectra of **Yb-1** in methanol

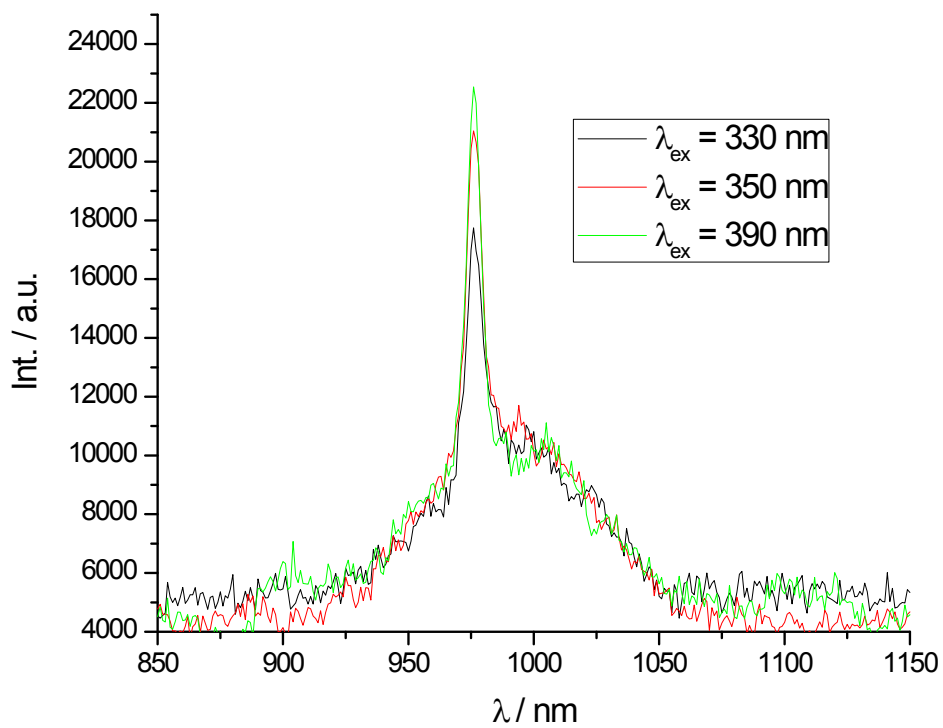

Figure S71 Emission spectra of **Yb-1** in fluorobenzene

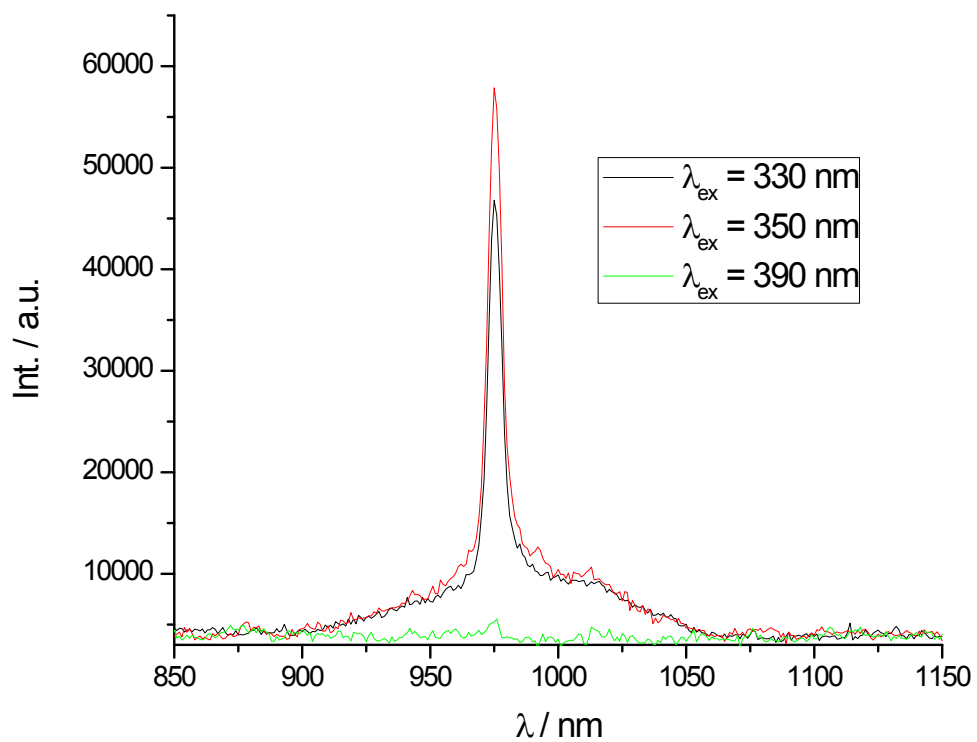

Figure S72 Emission spectra of **Yb-1** in tetrahydrofuran

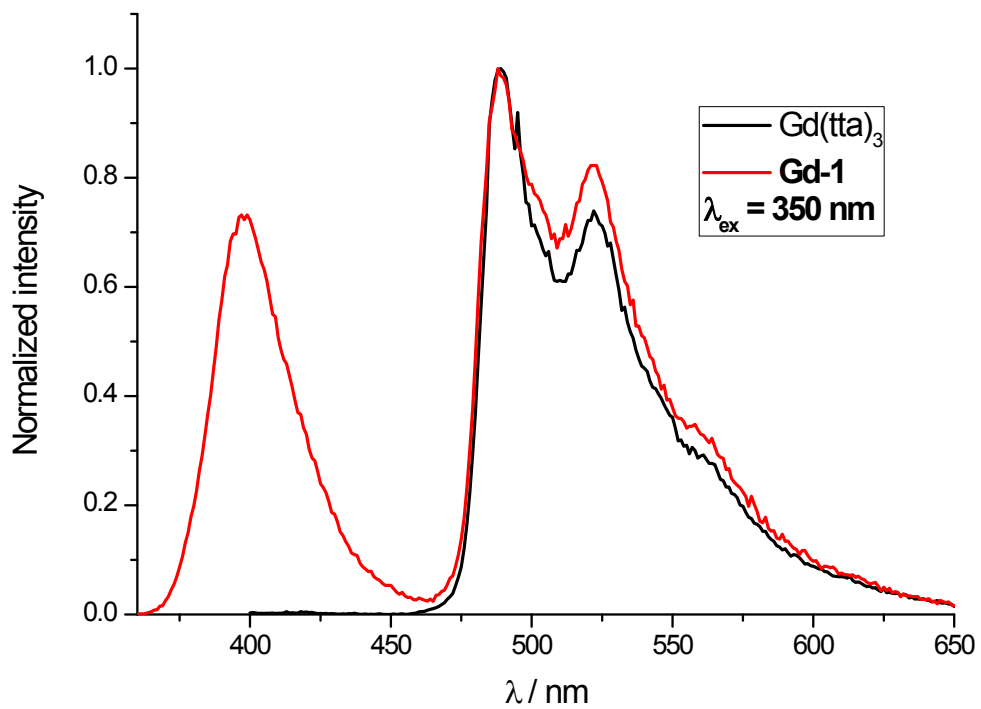

Figure S73 Low temperature (77 K) emission spectra of  $\text{Gd}(\text{tta})_3$  and **Gd-1**

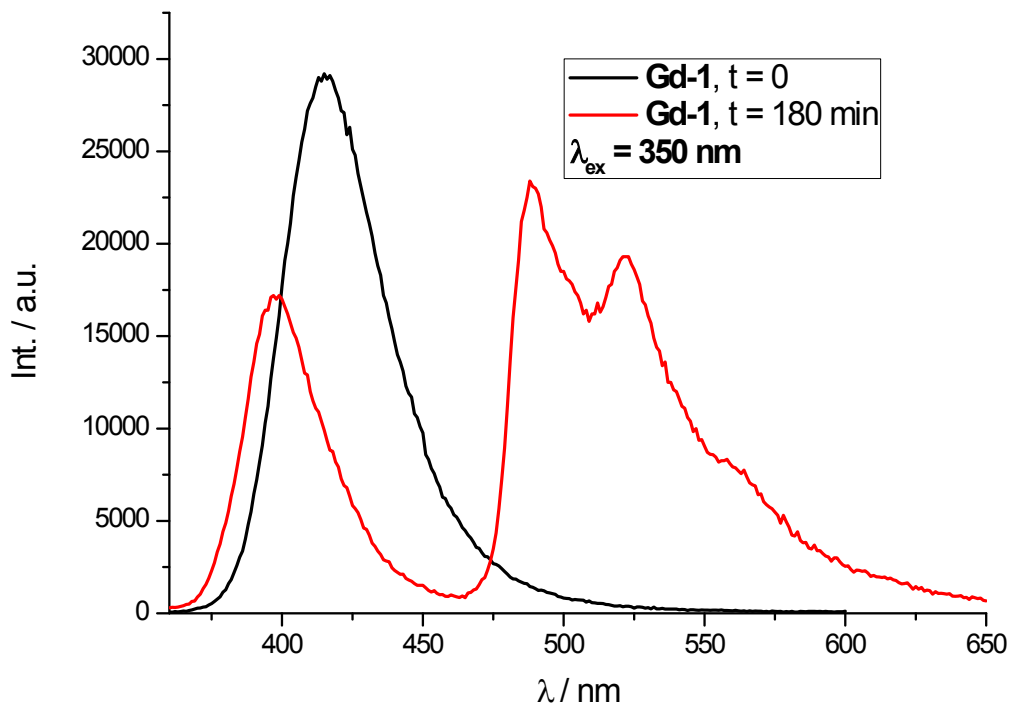

Figure S74 Room temperature and low temperature emission spectra of **Gd-1**



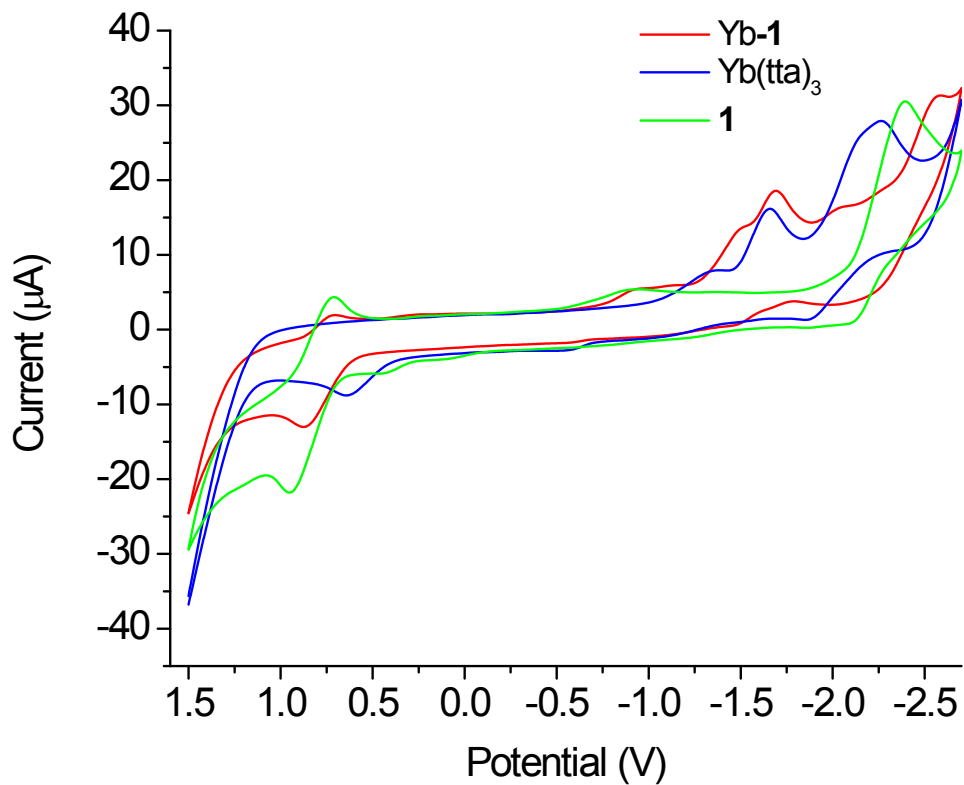

Figure S75 Cyclic voltammograms of **Yb-1**, Yb(tta)<sub>3</sub> and ligand **1**

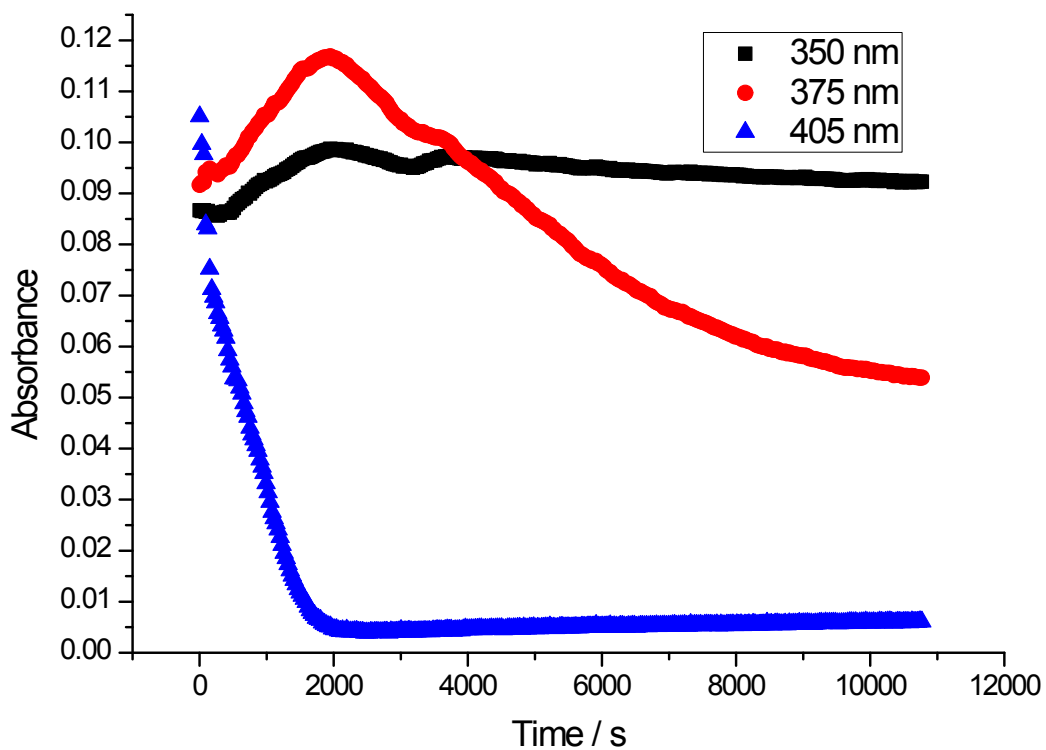

Figure S76 Graph of selected absorbance against time of **Sm-1** in carbon tetrachloride

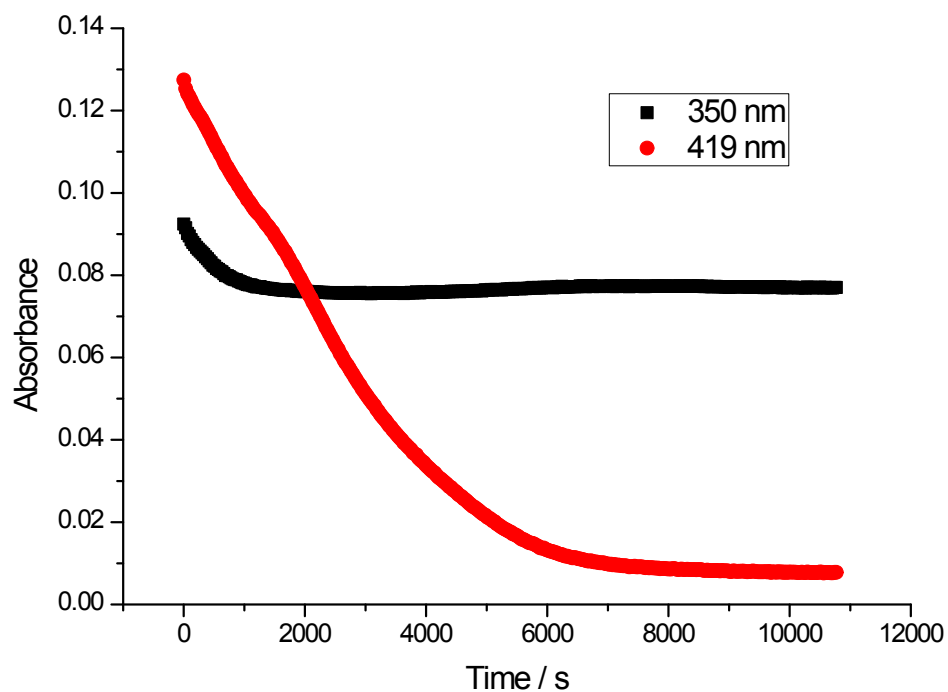

Figure S77 Graph of selected absorbance against time of **Sm-1** in chloroform

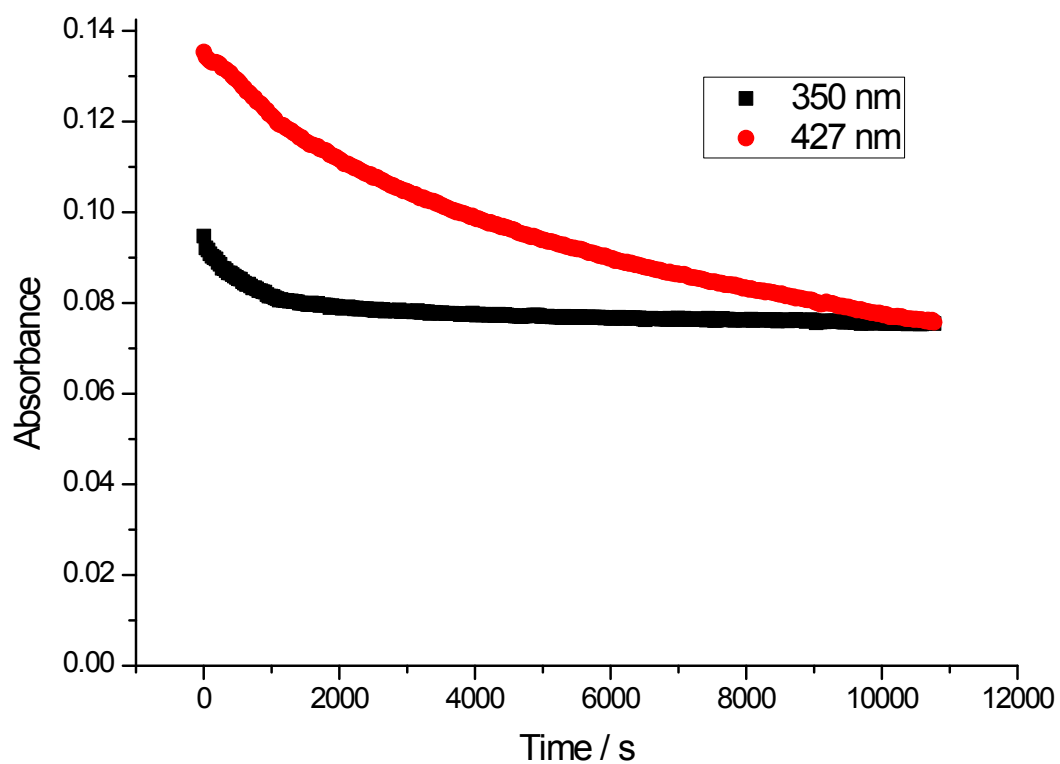

Figure S78 Graph of selected absorbance against time of **Sm-1** in dichloromethane

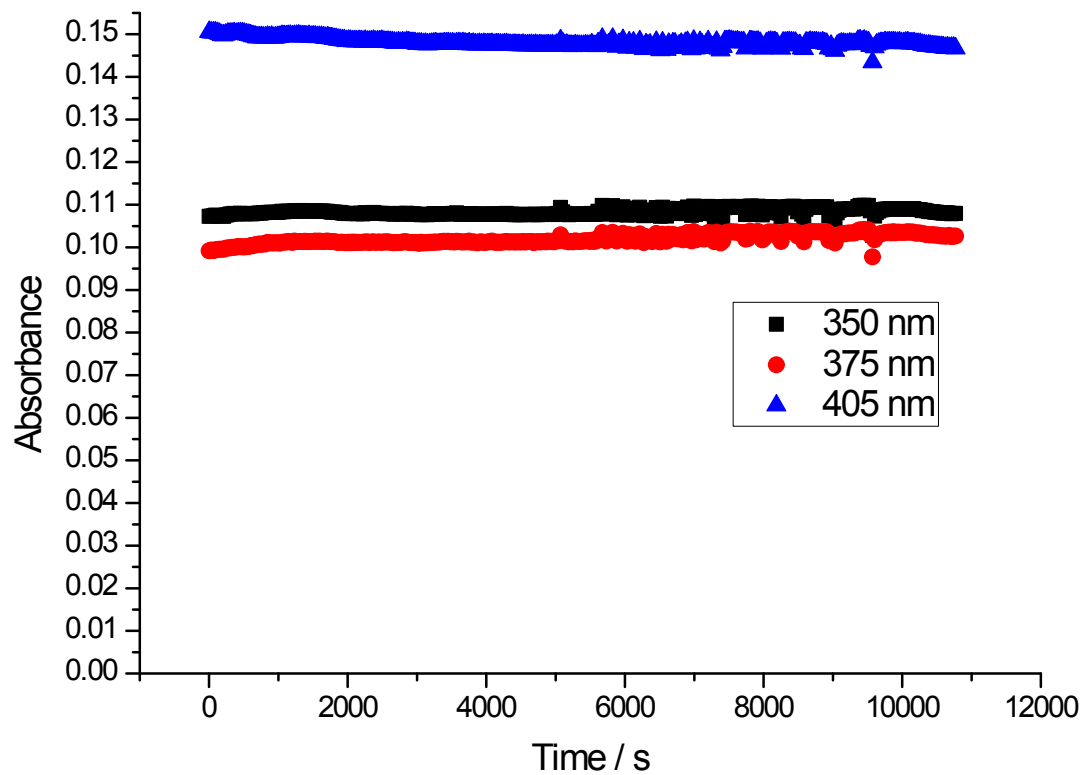

Figure S79 Graph of selected absorbance against time of **Sm-1** in benzene
